# Supplementary material for: Gene networks underlying the early regulation of Paraburkholderia phytofirmans PsJN induced systemic resistance in Arabidopsis
Source: PubMed Central journal article supplement (PMC6705864; doi:10.1371/journal.pone.0221358), 2019-08-22

A

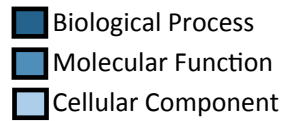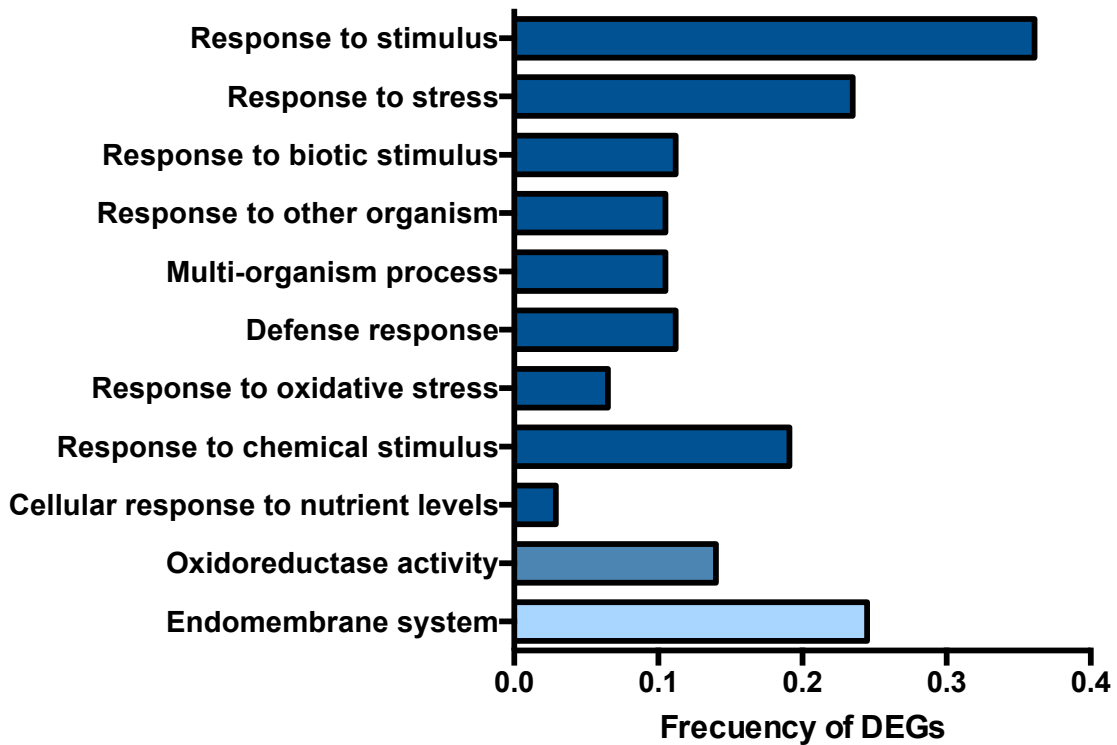

B

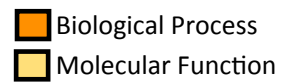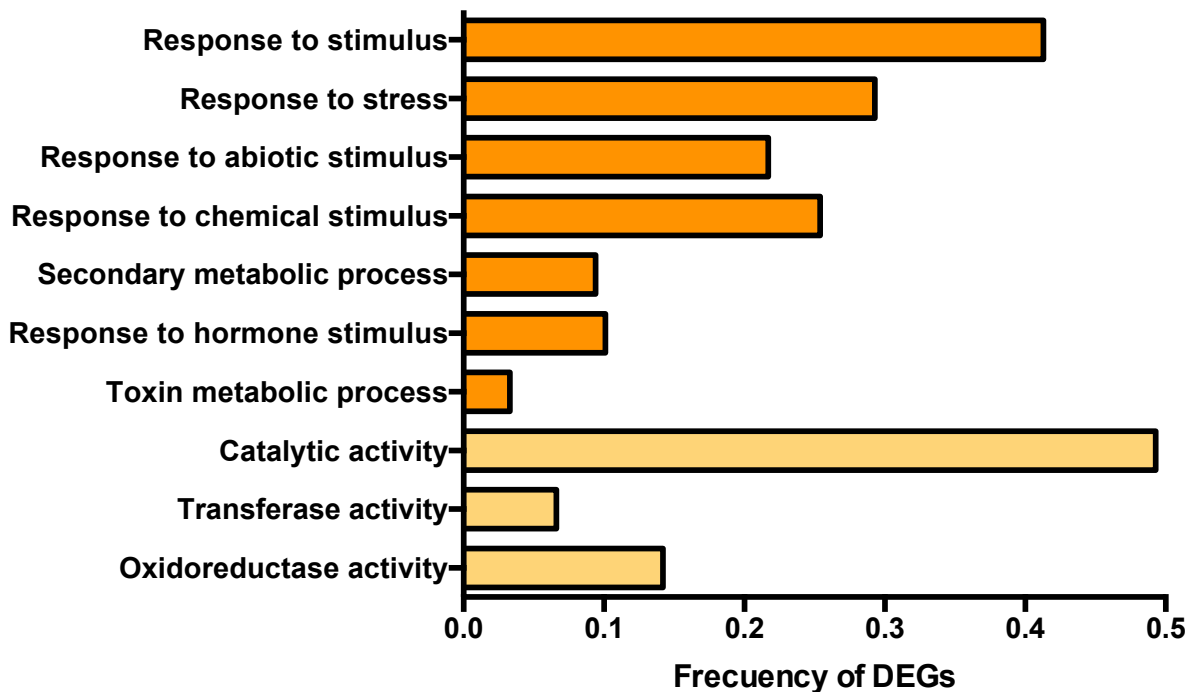

Supplement: pone.0221358.s001.pdf [file pone.0221358.s001.pdf]
