# Supplementary material for: Gene networks underlying the early regulation of Paraburkholderia phytofirmans PsJN induced systemic resistance in Arabidopsis
Source: PLoS One. 2019 Aug 22;14(8):e0221358. doi: 10.1371/journal.pone.0221358 (PMC6705864; doi:10.1371/journal.pone.0221358)
Supplement: S1 Table — (XLSX) [file pone.0221358.s002.xlsx]

## Sheet: 0 hpi Up-regulated
ID Affymetrix	Locus	Description	Fold change (Log2)	p-value
245052_at	AT2G26440	pectinesterase family protein	0.950189	0.0202326
245329_at	AT4G14365	zinc finger (C3HC4-type RING finger) family protein / ankyrin repeat family protein	1.03664	0.0135
245336_at	AT4G16515	unknown protein	0.707739	0.0484328
245874_at	no_match	no_match	1.11976	0.00363636
246108_at	AT5G28630	glycine-rich protein	1.09021	0.0113462
246238_at	AT4G36670	mannitol transporter, putative	1.10281	0.0102041
247327_at	AT5G64120	peroxidase, putative	1.0253	0.00755556
247377_at	AT5G63180	pectate lyase family protein	1.06513	0.00604651
247734_at	AT5G59400	unknown protein	1.19255	0.00333333
247754_at	AT5G59080	unknown protein	0.820678	0.0215217
247880_at	AT5G57780	EXPRESSED IN: 18 plant structures; EXPRESSED DURING: 12 growth stages; BEST Arabidopsis thaliana protein match is: transcription factor (TAIR:AT4G30410.2); Has 70 Blast hits to 70 proteins in 6 species: Archae - 0; Bacteria - 0; Metazoa - 0; Fungi - 0; Pl	0.81793	0.0182051
248050_at	AT5G56100	glycine-rich protein / oleosin	0.753403	0.0275
248062_at	AT5G55450	protease inhibitor/seed storage/lipid transfer protein (LTP) family protein	1.49346	0.00047619
248377_at	AT5G51720	unknown protein	2.62983	0
248491_at	AT5G51010	rubredoxin family protein	0.933102	0.0112
248509_at	AT5G50335	unknown protein	0.985803	0.013871
248793_at	AT5G47240	atnudt8 (Arabidopsis thaliana Nudix hydrolase homolog 8); hydrolase	1.09289	0.00361111
248910_at	AT5G45820	CIPK20 (CBL-INTERACTING PROTEIN KINASE 20); kinase/ protein serine/threonine kinase	1.41618	0
248932_at	AT5G46050	PTR3 (PEPTIDE TRANSPORTER 3); dipeptide transporter/ transporter/ tripeptide transporter	0.745358	0.05
249097_at	AT5G43520	DC1 domain-containing protein	0.866911	0.0192683
249215_at	AT5G42800	DFR (DIHYDROFLAVONOL 4-REDUCTASE); dihydrokaempferol 4-reductase	0.854481	0.035431
249346_at	AT5G40780	LHT1; amino acid transmembrane transporter	0.787985	0.0290654
249383_at	AT5G39860	PRE1 (PACLOBUTRAZOL RESISTANCE1); DNA binding / transcription factor	1.40836	0
249770_at	AT5G24110	WRKY30; transcription factor	0.749339	0.04048
249894_at	AT5G22580	FUNCTIONS IN: molecular_function unknown; INVOLVED IN: biological_process unknown; LOCATED IN: chloroplast; EXPRESSED IN: 22 plant structures; EXPRESSED DURING: 13 growth stages; CONTAINS InterPro DOMAIN/s: Stress responsive alpha-beta barrel (InterPro:IP	0.771593	0.0293396
250012_x_at	AT5G18060	auxin-responsive protein, putative	1.03557	0.0169014
250073_at	AT5G17170	ENH1 (enhancer of sos3-1); electron carrier/ metal ion binding / protein binding	1.19371	0.00217391
250155_at	AT5G15160	bHLH family protein	1.19144	0.00333333
250942_at	AT5G03350	legume lectin family protein	1.09019	0.0142857
251013_at	AT5G02540	short-chain dehydrogenase/reductase (SDR) family protein	0.949659	0.0137705
251109_at	AT5G01600	ATFER1; ferric iron binding / iron ion binding	1.57292	0.00358974
251243_at	AT3G61870	unknown protein	0.791371	0.0208989
251438_s_at	AT3G59930;AT5G33355	[AT3G59930, Encodes a defensin-like (DEFL) family protein.];[AT5G33355, Encodes a defensin-like (DEFL) family protein.]	1.46565	0.00357143
251919_at	AT3G53800	armadillo/beta-catenin repeat family protein	1.10025	0.00382353
252300_at	AT3G49160	pyruvate kinase family protein	2.59028	0
252346_at	AT3G48650	pseudogene, At14a-related protein, similar to At14a (GI:11994571 and GI:11994573) (Arabidopsis thaliana)	0.969918	0.00914894
252415_at	AT3G47340	ASN1 (GLUTAMINE-DEPENDENT ASPARAGINE SYNTHASE 1); asparagine synthase (glutamine-hydrolyzing)	0.780344	0.0333628
252511_at	AT3G46280	protein kinase-related	1.64986	0.00351351
252629_at	AT3G44970	cytochrome P450 family protein	0.926036	0.0165217
252906_at	AT4G39640	GGT1 (GAMMA-GLUTAMYL TRANSPEPTIDASE 1); gamma-glutamyltransferase/ glutathione gamma-glutamylcysteinyltransferase	0.703732	0.0456489
252965_at	AT4G38860	auxin-responsive protein, putative	0.811997	0.0286408
252970_at	AT4G38850	SAUR15 (SMALL AUXIN UPREGULATED 15)	1.09901	0.00571429
253088_at	AT4G36220	FAH1 (FERULIC ACID 5-HYDROXYLASE 1); ferulate 5-hydroxylase/ monooxygenase	0.681137	0.0497778
253103_at	AT4G36110	auxin-responsive protein, putative	0.741502	0.0444186
253126_at	AT4G36050	endonuclease/exonuclease/phosphatase family protein	0.838313	0.0268367
253141_at	AT4G35440	CLC-E (CHLORIDE CHANNEL E); ion channel/ voltage-gated chloride channel	0.757276	0.0286275
253423_at	AT4G32280	IAA29 (INDOLE-3-ACETIC ACID INDUCIBLE 29); transcription factor	1.03127	0.0165714
253871_at	AT4G27440	PORB (PROTOCHLOROPHYLLIDE OXIDOREDUCTASE B); oxidoreductase/ protochlorophyllide reductase	1.25102	0.00333333
253911_at	AT4G27300	S-locus protein kinase, putative	0.845997	0.0232979
253971_at	AT4G26530	fructose-bisphosphate aldolase, putative	1.21281	0.0036
254098_at	AT4G25100	FSD1 (FE SUPEROXIDE DISMUTASE 1); copper ion binding / superoxide dismutase	0.829124	0.0197619
254174_at	AT4G24120	YSL1 (YELLOW STRIPE LIKE 1); oligopeptide transporter	1.51553	0
254231_at	AT4G23810	WRKY53; DNA binding / protein binding / transcription activator/ transcription factor	0.878372	0.0193976
254243_at	AT4G23210	protein kinase family protein	0.877915	0.0290476
254255_at	AT4G23220	kinase	0.833622	0.0179012
254314_at	AT4G22470	protease inhibitor/seed storage/lipid transfer protein (LTP) family protein	1.90343	0
254331_s_at	AT4G22690;AT4G22710	[AT4G22690, CYP706A1; electron carrier/ heme binding / iron ion binding / monooxygenase/ oxygen binding];[AT4G22710, CYP706A2; electron carrier/ heme binding / iron ion binding / monooxygenase/ oxygen binding]	0.901619	0.0177778
254524_at	AT4G20000	VQ motif-containing protein	0.774451	0.0395935
254764_at	AT4G13250	short-chain dehydrogenase/reductase (SDR) family protein	1.45058	0
254805_at	AT4G12480	pEARLI 1; lipid binding	2.27297	0
254818_at	AT4G12470	protease inhibitor/seed storage/lipid transfer protein (LTP) family protein	2.97747	0
254819_at	AT4G12500	protease inhibitor/seed storage/lipid transfer protein (LTP) family protein	1.97876	0
254828_at	AT4G12550	AIR1; lipid binding	1.00381	0.0118868
254832_at	AT4G12490	protease inhibitor/seed storage/lipid transfer protein (LTP) family protein	2.42796	0
255305_at	AT4G04770	ATABC1 (ATP BINDING CASSETTE PROTEIN 1); ATPase, coupled to transmembrane movement of substances / protein binding / transporter	0.813367	0.0217204
255310_at	AT4G04955	ATALN (Arabidopsis allantoinase); allantoinase/ hydrolase	1.00085	0.00979167
255591_at	AT4G01630	ATEXPA17 (ARABIDOPSIS THALIANA EXPANSIN A17)	0.853742	0.0176316
255822_at	AT2G40610	ATEXPA8 (ARABIDOPSIS THALIANA EXPANSIN A8)	1.59797	0
256020_at	AT1G58290	HEMA1; glutamyl-tRNA reductase	1.51616	0
256096_at	AT1G13650	FUNCTIONS IN: molecular_function unknown; INVOLVED IN: biological_process unknown; LOCATED IN: cellular_component unknown; EXPRESSED IN: 15 plant structures; EXPRESSED DURING: 6 growth stages; BEST Arabidopsis thaliana protein match is: 18S pre-ribosomal	1.50443	0
256299_at	AT1G69530	ATEXPA1 (ARABIDOPSIS THALIANA EXPANSIN A1)	1.41076	0
256300_at	AT1G69490	NAP (NAC-like, activated by AP3/PI); transcription factor	0.829921	0.0317273
256469_at	AT1G32540	LOL1 (LSD ONE LIKE 1); DNA binding	1.14247	0.00439024
256655_at	AT3G18890	binding / catalytic/ coenzyme binding	0.717022	0.0354783
256746_at	AT3G29320	glucan phosphorylase, putative	0.763865	0.0411111
256766_at	AT3G22231	PCC1 (PATHOGEN AND CIRCADIAN CONTROLLED 1)	1.70896	0
256940_at	AT3G30720	QQS (QUA-QUINE STARCH)	0.844096	0.0175342
257365_x_at	AT2G26020	PDF1.2b (plant defensin 1.2b)	2.09284	0
257479_at	AT1G16150	WAKL4 (WALL ASSOCIATED KINASE-LIKE 4); kinase	0.699472	0.0475
257772_at	AT3G23080	FUNCTIONS IN: molecular_function unknown; INVOLVED IN: biological_process unknown; EXPRESSED IN: 23 plant structures; EXPRESSED DURING: 13 growth stages; CONTAINS InterPro DOMAIN/s: Lipid-binding START (InterPro:IPR002913); BEST Arabidopsis thaliana prote	0.836097	0.0181013
258239_at	AT3G27690	LHCB2.3; chlorophyll binding	0.833631	0.0352137
258339_at	AT3G16120	dynein light chain, putative	0.890185	0.0126316
258419_at	AT3G16670	unknown protein	1.05545	0.0111765
258434_at	AT3G16770	ATEBP (ETHYLENE-RESPONSIVE ELEMENT BINDING PROTEIN); DNA binding / protein binding / transcription activator/ transcription factor	0.758048	0.0333929
259544_at	AT1G20620	CAT3 (CATALASE 3); catalase	1.11497	0.00371429
259640_at	AT1G52400	BGLU18 (BETA GLUCOSIDASE 18); catalytic/ cation binding / hydrolase, hydrolyzing O-glycosyl compounds	0.876038	0.0396774
259839_at	AT1G52190	proton-dependent oligopeptide transport (POT) family protein	0.772331	0.0390984
259871_at	AT1G76800	nodulin, putative	0.8919	0.0158824
259925_at	AT1G75040	PR5 (PATHOGENESIS-RELATED GENE 5)	1.12613	0.00344828
260221_at	AT1G74670	gibberellin-responsive protein, putative	0.89183	0.03525
260495_at	AT2G41810	FUNCTIONS IN: molecular_function unknown; INVOLVED IN: biological_process unknown; LOCATED IN: endomembrane system; EXPRESSED IN: root; CONTAINS InterPro DOMAIN/s: Protein of unknown function DUF642 (InterPro:IPR006946), Galactose-binding like (InterPro:I	0.922234	0.012037
260556_at	AT2G43620	chitinase, putative	2.76539	0
260727_at	AT1G48100	glycoside hydrolase family 28 protein / polygalacturonase (pectinase) family protein	0.870803	0.0265657
260869_at	AT1G43800	acyl-(acyl-carrier-protein) desaturase, putative / stearoyl-ACP desaturase, putative	1.19593	0.0163636
261135_at	AT1G19610	PDF1.4	2.47155	0
261339_at	AT1G35710	leucine-rich repeat transmembrane protein kinase, putative	0.823106	0.0210227
262212_at	AT1G74890	ARR15 (RESPONSE REGULATOR 15); transcription regulator/ two-component response regulator	0.705299	0.0478195
262793_at	AT1G13110	CYP71B7; electron carrier/ heme binding / iron ion binding / monooxygenase/ oxygen binding	0.754082	0.0287963
263098_at	AT2G16005	MD-2-related lipid recognition domain-containing protein / ML domain-containing protein	2.22075	0
263106_at	AT2G05160	zinc finger (CCCH-type) family protein / RNA recognition motif (RRM)-containing protein	0.703363	0.0442308
263126_at	AT1G78460	SOUL heme-binding family protein	0.761277	0.0336036
263443_at	AT2G28630	KCS12 (3-KETOACYL-COA SYNTHASE 12); acyltransferase/ catalytic/ transferase, transferring acyl groups other than amino-acyl groups	0.867424	0.0196471
263498_at	AT2G42610	LSH10 (LIGHT SENSITIVE HYPOCOTYLS 10)	0.761508	0.0246392
263549_at	AT2G21650	MEE3 (MATERNAL EFFECT EMBRYO ARREST 3); DNA binding / transcription factor	1.13192	0.0126786
263765_at	AT2G21540	SFH3 (SEC14-LIKE 3); phosphatidylinositol transporter	0.891435	0.0167188
263831_at	AT2G40300	ATFER4 (ferritin 4); binding / ferric iron binding / oxidoreductase/ transition metal ion binding	1.23338	0.00387097
263840_at	AT2G36885	unknown protein	1.18335	0.00375
264153_at	AT1G65390	ATPP2-A5 (ARABIDOPSIS THALIANA PHLOEM PROTEIN 2 A5); carbohydrate binding	0.810946	0.0425781
264195_at	AT1G22690	gibberellin-responsive protein, putative	0.761448	0.0284615
264261_at	AT1G09240	NAS3 (NICOTIANAMINE SYNTHASE 3); nicotianamine synthase	0.837342	0.0205747
264567_s_at	AT1G05250;AT1G05240	[AT1G05250, peroxidase, putative];[AT1G05240, peroxidase, putative]	0.931931	0.0248958
264616_at	AT2G17740	DC1 domain-containing protein	1.27805	0.000454545
264635_at	AT1G65500	unknown protein	1.15358	0.00342105
264672_at	AT1G09750	chloroplast nucleoid DNA-binding protein-related	0.884947	0.0174324
264782_at	AT1G08810	MYB60 (myb domain protein 60); DNA binding / transcription factor	0.886144	0.0137288
265051_at	AT1G52100	jacalin lectin family protein	0.738276	0.0355462
265091_s_at	AT1G03940;AT1G03495	[AT1G03940, transferase family protein];[AT1G03495, transferase/ transferase, transferring acyl groups other than amino-acyl groups]	0.97259	0.0176623
265208_at	AT2G36690	oxidoreductase, 2OG-Fe(II) oxygenase family protein	1.23794	0.00346154
265611_at	AT2G25510	unknown protein	0.735312	0.0393388
265722_at	AT2G40100	LHCB4.3 (light harvesting complex PSII); chlorophyll binding	0.912382	0.0127586
265917_at	AT2G15080	AtRLP19 (Receptor Like Protein 19); kinase/ protein binding	0.99866	0.00934783
265993_at	AT2G24160	pseudogene, leucine rich repeat protein family, contains leucine rich-repeat domains Pfam:PF00560, INTERPRO:IPR001611; contains some similarity to Cf-4 (Lycopersicon hirsutum) gi|2808683|emb|CAA05268; blastp match of 37% identity and 8.4e-98 P-value to GP	0.925039	0.0176
266393_at	AT2G41260	M17	0.808753	0.0285149
266899_at	AT2G34620	mitochondrial transcription termination factor-related / mTERF-related	0.735444	0.0311009
266992_at	AT2G39200	MLO12 (MILDEW RESISTANCE LOCUS O 12); calmodulin binding	0.901817	0.0214444
267045_at	AT2G34180	CIPK13 (CBL-INTERACTING PROTEIN KINASE 13); ATP binding / kinase/ protein kinase/ protein serine/threonine kinase	0.738953	0.041811
267076_at	AT2G41090	calmodulin-like calcium-binding protein, 22 kDa (CaBP-22)	0.850061	0.0166154
267158_at	AT2G37640	EXP3	0.865847	0.0161194
267384_at	AT2G44370	DC1 domain-containing protein	1.05065	0.0216484
267436_at	AT2G19190	FRK1 (FLG22-INDUCED RECEPTOR-LIKE KINASE 1); kinase	1.0369	0.00704545
267614_at	AT2G26710	BAS1 (PHYB ACTIVATION TAGGED SUPPRESSOR 1); oxygen binding / steroid hydroxylase	0.768581	0.0339474

## Sheet: 0 hpi Down-regulated
ID Affymetrix	Locus	Description	Fold change (Log2)	p-value
245038_at	AT2G26560	PLA2A (PHOSPHOLIPASE A 2A); lipase/ nutrient reservoir	-1.05596	0.0173723
245119_at	AT2G41640	transferase, transferring glycosyl groups	-1.6336	0.0014
245193_at	AT1G67810	SUFE2 (SULFUR E 2); enzyme activator	-0.911927	0.0349727
245262_at	AT4G16563	aspartyl protease family protein	-1.27405	0.0125
245296_at	AT4G16370	ATOPT3 (OLIGOPEPTIDE TRANSPORTER); oligopeptide transporter	-1.34824	0.00752809
245306_at	AT4G14690	ELIP2 (EARLY LIGHT-INDUCIBLE PROTEIN 2); chlorophyll binding	-1.18057	0.0121569
245352_at	AT4G15490	UGT84A3; UDP-glycosyltransferase/ sinapate 1-glucosyltransferase/ transferase, transferring glycosyl groups	-1.2205	0.0157143
245412_at	AT4G17280	INVOLVED IN: multicellular organismal development; LOCATED IN: membrane; EXPRESSED IN: 11 plant structures; EXPRESSED DURING: 6 growth stages; CONTAINS InterPro DOMAIN/s: Uncharacterised conserved protein UCP037471 (InterPro:IPR017214), Protein of unknown	-1.00325	0.0222148
245692_at	AT5G04150	BHLH101; DNA binding / transcription factor	-3.13405	0
245757_at	AT1G35140	PHI-1 (PHOSPHATE-INDUCED 1)	-2.19	0
245976_at	AT5G13080	WRKY75; transcription factor	-0.869025	0.0374429
246042_at	AT5G19440	cinnamyl-alcohol dehydrogenase, putative (CAD)	-0.790124	0.0483142
246197_at	AT4G37010	caltractin, putative / centrin, putative	-1.5948	0.00122449
246200_at	AT4G37240	unknown protein	-0.923329	0.0363021
246250_at	AT4G36880	CP1 (CYSTEINE PROTEINASE1); cysteine-type endopeptidase/ cysteine-type peptidase	-2.20399	0
246252_s_at	AT4G37070;AT4G37060	[AT4G37070, patatin, putative];[AT4G37060, PLP5 (PATATIN-LIKE PROTEIN 5); nutrient reservoir]	-1.30807	0.00632911
246273_at	AT4G36700	cupin family protein	-2.72852	0
246375_at	AT1G51830	ATP binding / kinase/ protein serine/threonine kinase	-1.03425	0.0305917
246463_at	AT5G16970	AT-AER (alkenal reductase); 2-alkenal reductase	-1.09083	0.014958
246464_at	AT5G16980	NADP-dependent oxidoreductase, putative	-1.76488	0.000285714
246789_at	AT5G27600	LACS7 (LONG-CHAIN ACYL-COA SYNTHETASE 7); long-chain-fatty-acid-CoA ligase/ protein binding	-0.979648	0.0237013
246926_at	AT5G25240	FUNCTIONS IN: molecular_function unknown; INVOLVED IN: biological_process unknown; LOCATED IN: cellular_component unknown; EXPRESSED IN: 23 plant structures; EXPRESSED DURING: 13 growth stages; BEST Arabidopsis thaliana protein match is: NHL repeat-contai	-0.882942	0.0398222
247013_at	AT5G67480	BT4 (BTB AND TAZ DOMAIN PROTEIN 4); protein binding / transcription regulator	-1.39842	0.0040625
247091_at	AT5G66390	peroxidase 72 (PER72) (P72) (PRXR8)	-1.43512	0.00258621
247189_at	AT5G65390	AGP7	-0.877389	0.0369014
247351_at	AT5G63790	ANAC102 (ARABIDOPSIS NAC DOMAIN CONTAINING PROTEIN 102); transcription factor	-0.935211	0.0338983
247488_at	AT5G61820	FUNCTIONS IN: molecular_function unknown; INVOLVED IN: biological_process unknown; LOCATED IN: vacuole; EXPRESSED IN: 24 plant structures; EXPRESSED DURING: 15 growth stages; CONTAINS InterPro DOMAIN/s: Stress up-regulated Nod 19 (InterPro:IPR011692); Has	-1.7906	0.000487805
247543_at	AT5G61600	ethylene-responsive element-binding family protein	-1.15386	0.0173881
247704_at	AT5G59510	RTFL5 (ROTUNDIFOLIA LIKE 5)	-1.13958	0.0135897
247717_at	AT5G59320	LTP3 (LIPID TRANSFER PROTEIN 3); lipid binding	-1.25343	0.0386547
247718_at	AT5G59310	LTP4 (LIPID TRANSFER PROTEIN 4); lipid binding	-1.20155	0.0386036
247729_at	AT5G59530	2-oxoglutarate-dependent dioxygenase, putative	-1.22797	0.00959184
247925_at	AT5G57560	TCH4 (Touch 4); hydrolase, acting on glycosyl bonds / xyloglucan:xyloglucosyl transferase	-1.13872	0.0172593
248048_at	AT5G56080	NAS2 (NICOTIANAMINE SYNTHASE 2); nicotianamine synthase	-2.80565	0
248178_at	AT5G54370	late embryogenesis abundant protein-related / LEA protein-related	-0.803461	0.044879
248270_at	AT5G53450	ORG1 (OBP3-responsive gene 1); ATP binding / kinase/ protein kinase	-1.96963	0
248434_at	AT5G51440	23.5 kDa mitochondrial small heat shock protein (HSP23.5-M)	-1.08009	0.0397357
248528_at	AT5G50760	auxin-responsive family protein	-1.10368	0.023949
248607_at	AT5G49480	ATCP1 (Ca2+-binding protein 1); calcium ion binding	-1.28846	0.00678161
248727_at	AT5G47990	CYP705A5; oxygen binding / thalian-diol desaturase	-0.999145	0.039569
248728_at	AT5G48000	CYP708A2; oxygen binding / thalianol hydroxylase	-1.05325	0.0355319
248729_at	AT5G48010	THAS1 (THALIANOL SYNTHASE 1); catalytic/ thalianol synthase	-1.63394	0.00173077
248750_at	AT5G47530	auxin-responsive protein, putative	-0.831992	0.0419167
248978_at	AT5G45070	AtPP2-A8 (Phloem protein 2-A8); carbohydrate binding	-0.832713	0.0401277
249063_at	AT5G44110	POP1; transporter	-0.861878	0.0359799
249101_at	AT5G43580	serine-type endopeptidase inhibitor	-1.21144	0.00938144
249203_at	AT5G42590	CYP71A16; electron carrier/ heme binding / iron ion binding / monooxygenase/ oxygen binding	-1.30867	0.00902174
249289_at	AT5G41040	transferase family protein	-0.900839	0.0359184
249476_at	AT5G38910	germin-like protein, putative	-2.05367	0
249481_at	AT5G38900	DSBA oxidoreductase family protein	-1.16808	0.0119802
249545_at	AT5G38030	MATE efflux family protein	-0.999953	0.0196528
249752_at	AT5G24660	LSU2 (RESPONSE TO LOW SULFUR 2)	-1.66149	0.00106383
249765_at	AT5G24030	SLAH3 (SLAC1 HOMOLOGUE 3); transporter	-0.964268	0.0293976
249767_at	AT5G24090	acidic endochitinase (CHIB1)	-1.25454	0.00638554
249847_at	AT5G23210	SCPL34; serine-type carboxypeptidase	-0.845829	0.0402564
249848_at	AT5G23220	NIC3 (NICOTINAMIDASE 3); catalytic/ nicotinamidase	-1.09848	0.01528
249881_at	AT5G23190	CYP86B1; electron carrier/ heme binding / iron ion binding / monooxygenase/ oxygen binding	-0.830977	0.0468924
249942_at	AT5G22300	NIT4 (NITRILASE 4); 3-cyanoalanine hydratase/ cyanoalanine nitrilase/ indole-3-acetonitrile nitrilase/ nitrilase/ nitrile hydratase	-1.03258	0.0194406
250024_at	AT5G18270	ANAC087; transcription factor	-0.947192	0.0269811
250094_at	AT5G17380	pyruvate decarboxylase family protein	-0.870012	0.0367757
250230_at	AT5G13900	protease inhibitor/seed storage/lipid transfer protein (LTP) family protein	-1.14886	0.0124038
250248_at	AT5G13740	ZIF1 (ZINC INDUCED FACILITATOR 1); carbohydrate transmembrane transporter/ sugar:hydrogen symporter/ tetracycline:hydrogen antiporter	-0.900112	0.039646
250252_at	AT5G13750	ZIFL1 (ZINC INDUCED FACILITATOR-like 1); tetracycline:hydrogen antiporter	-1.29483	0.00625
250296_at	AT5G12020	HSP17.6II (17.6 KDA CLASS II HEAT SHOCK PROTEIN)	-1.18435	0.0355615
250449_at	AT5G10830	embryo-abundant protein-related	-1.08858	0.0138136
250472_at	AT5G10210	FUNCTIONS IN: molecular_function unknown; INVOLVED IN: biological_process unknown; LOCATED IN: cellular_component unknown; EXPRESSED IN: hypocotyl, root; CONTAINS InterPro DOMAIN/s: C2 calcium-dependent membrane targeting (InterPro:IPR000008); BEST Arabid	-1.39749	0.00552239
250646_at	AT5G06720	peroxidase, putative	-0.882142	0.0439095
250670_at	AT5G06860	PGIP1 (POLYGALACTURONASE INHIBITING PROTEIN 1); protein binding	-1.52597	0.00207547
250828_at	AT5G05250	unknown protein	-1.92196	0.0003125
250832_at	AT5G04950	NAS1 (NICOTIANAMINE SYNTHASE 1); nicotianamine synthase	-1.1149	0.0134821
250936_at	AT5G03120	unknown protein	-0.849141	0.0439754
250983_at	AT5G02780	In2-1 protein, putative	-1.29937	0.00630952
251428_at	AT3G60140	DIN2 (DARK INDUCIBLE 2); catalytic/ cation binding / hydrolase, hydrolyzing O-glycosyl compounds	-1.14116	0.0191549
251494_at	AT3G59350	serine/threonine protein kinase, putative	-0.821335	0.0491698
251503_at	AT3G59140	ATMRP14; ATPase, coupled to transmembrane movement of substances	-0.97204	0.028773
251545_at	AT3G58810	MTPA2 (METAL TOLERANCE PROTEIN A2); efflux transmembrane transporter/ inorganic anion transmembrane transporter/ zinc ion transmembrane transporter	-1.06822	0.0171429
251677_at	AT3G56980	BHLH039; DNA binding / transcription factor	-3.30715	0
251704_at	AT3G56360	unknown protein	-1.26023	0.00947368
251743_at	AT3G55890	yippee family protein	-0.852653	0.0395614
251755_at	AT3G55790	unknown protein	-1.24813	0.00892473
251857_at	AT3G54770	RNA recognition motif (RRM)-containing protein	-0.82115	0.0406356
251942_at	AT3G53480	PDR9 (PLEIOTROPIC DRUG RESISTANCE 9); ATPase, coupled to transmembrane movement of substances	-1.44563	0.00283333
251970_at	AT3G53150	UGT73D1 (UDP-glucosyl transferase 73D1); UDP-glycosyltransferase/ transferase, transferring hexosyl groups	-0.833285	0.0468651
251975_at	AT3G53230	cell division cycle protein 48, putative / CDC48, putative	-0.975626	0.0472835
252102_at	AT3G50970	LTI30 (LOW TEMPERATURE-INDUCED 30)	-0.939004	0.0359487
252209_at	AT3G50400	GDSL-motif lipase/hydrolase family protein	-1.36992	0.00469697
252269_at	AT3G49580	LSU1 (RESPONSE TO LOW SULFUR 1)	-2.03618	0
252383_at	AT3G47780	ATATH6; ATPase, coupled to transmembrane movement of substances / transporter	-0.780634	0.0492135
252563_at	AT3G45970	ATEXLA1 (ARABIDOPSIS THALIANA EXPANSIN-LIKE A1)	-1.92344	0
252993_at	AT4G38540	monooxygenase, putative (MO2)	-0.816243	0.0458
252997_at	AT4G38400	ATEXLA2 (ARABIDOPSIS THALIANA EXPANSIN-LIKE A2)	-1.07321	0.0218919
253046_at	AT4G37370	CYP81D8; electron carrier/ heme binding / iron ion binding / monooxygenase/ oxygen binding	-1.45393	0.00419355
253268_s_at	AT4G34131;AT4G34135	[AT4G34131, UGT73B3 (UDP-glucosyl transferase 73B3); UDP-glycosyltransferase/ abscisic acid glucosyltransferase/ quercetin 3-O-glucosyltransferase/ transferase, transferring hexosyl groups];[AT4G34135, UGT73B2 (UDP-GLUCOSYLTRANSFERASE 73B2); UDP-glucosylt	-1.93453	0
253281_at	AT4G34138	UGT73B1 (UDP-glucosyl transferase 73B1); UDP-glycosyltransferase/ abscisic acid glucosyltransferase/ quercetin 3-O-glucosyltransferase/ quercetin 7-O-glucosyltransferase	-0.907306	0.0358376
253343_at	AT4G33540	metallo-beta-lactamase family protein	-1.07908	0.0174046
253485_at	AT4G31800	WRKY18; transcription factor	-0.90644	0.0450202
253502_at	AT4G31940	CYP82C4; electron carrier/ heme binding / iron ion binding / monooxygenase/ oxygen binding	-1.97298	0.00027027
253505_at	AT4G31970	CYP82C2; electron carrier/ heme binding / iron ion binding / monooxygenase/ oxygen binding	-2.92395	0
253582_at	AT4G30670	unknown protein	-1.07467	0.0172727
253628_at	AT4G30280	XTH18 (XYLOGLUCAN ENDOTRANSGLUCOSYLASE/HYDROLASE 18); hydrolase, acting on glycosyl bonds / hydrolase, hydrolyzing O-glycosyl compounds / xyloglucan:xyloglucosyl transferase	-1.42288	0.00430769
253666_at	AT4G30270	MERI5B (meristem-5); hydrolase, acting on glycosyl bonds / xyloglucan:xyloglucosyl transferase	-0.998284	0.0231126
253776_at	AT4G28390	AAC3 (ADP/ATP CARRIER 3); ATP:ADP antiporter/ binding	-0.867596	0.0476953
253841_at	AT4G27830	BGLU10 (BETA GLUCOSIDASE 10); catalytic/ cation binding / hydrolase, hydrolyzing O-glycosyl compounds	-0.877352	0.0417227
253915_at	AT4G27280	calcium-binding EF hand family protein	-0.947699	0.0490875
254024_at	AT4G25780	pathogenesis-related protein, putative	-0.868048	0.0447755
254042_at	AT4G25810	XTR6 (XYLOGLUCAN ENDOTRANSGLYCOSYLASE 6); hydrolase, acting on glycosyl bonds / hydrolase, hydrolyzing O-glycosyl compounds / xyloglucan:xyloglucosyl transferase	-1.98292	0
254204_at	AT4G24160	hydrolase, alpha/beta fold family protein	-0.903565	0.0311628
254226_at	AT4G23690	disease resistance-responsive family protein / dirigent family protein	-0.8013	0.04861
254318_at	AT4G22530	embryo-abundant protein-related	-0.830233	0.0396104
254500_at	AT4G20110	vacuolar sorting receptor, putative	-0.866156	0.0394643
254549_at	AT4G19880	FUNCTIONS IN: molecular_function unknown; INVOLVED IN: response to cadmium ion; LOCATED IN: chloroplast; EXPRESSED IN: 23 plant structures; EXPRESSED DURING: 13 growth stages; CONTAINS InterPro DOMAIN/s: Glutathione S-transferase, predicted (InterPro:IPR0	-1.0903	0.0148361
254550_at	AT4G19690	IRT1 (iron-regulated transporter 1); cadmium ion transmembrane transporter/ copper uptake transmembrane transporter/ iron ion transmembrane transporter/ manganese ion transmembrane transporter/ zinc ion transmembrane transporter	-2.11118	0
254630_at	AT4G18360	(S)-2-hydroxy-acid oxidase, peroxisomal, putative / glycolate oxidase, putative / short chain alpha-hydroxy acid oxidase, putative	-1.28228	0.00621951
254707_at	AT4G18010	AT5PTASE2 (MYO-INOSITOL POLYPHOSPHATE 5-PHOSPHATASE 2); inositol-polyphosphate 5-phosphatase	-1.27155	0.00617284
254718_at	AT4G13580	disease resistance-responsive family protein	-1.18014	0.0118
254759_at	AT4G13180	short-chain dehydrogenase/reductase (SDR) family protein	-1.87656	0
254820_s_at	AT4G12510;AT4G12520	[AT4G12510, protease inhibitor/seed storage/lipid transfer protein (LTP) family protein];[AT4G12520, protease inhibitor/seed storage/lipid transfer protein (LTP) family protein]	-1.08676	0.0156693
254890_at	AT4G11600	ATGPX6 (GLUTATHIONE PEROXIDASE 6); glutathione peroxidase	-0.876504	0.036114
254975_at	AT4G10500	oxidoreductase, 2OG-Fe(II) oxygenase family protein	-1.90602	0
255064_at	AT4G08950	EXO (EXORDIUM)	-0.98792	0.0368293
255080_at	AT4G09030	AGP10 (ARABINOGALACTAN PROTEIN 10)	-0.850656	0.038733
255177_at	AT4G08040	ACS11; 1-aminocyclopropane-1-carboxylate synthase	-0.884228	0.0362745
255259_at	AT4G05020	NDB2 (NAD(P)H dehydrogenase B2); FAD binding / disulfide oxidoreductase/ oxidoreductase	-0.916364	0.0361616
255479_at	AT4G02380	SAG21 (SENESCENCE-ASSOCIATED GENE 21)	-0.889203	0.0374654
255521_at	AT4G02280	SUS3 (sucrose synthase 3); UDP-glycosyltransferase/ sucrose synthase/ transferase, transferring glycosyl groups	-1.05957	0.0332571
255543_at	AT4G01870	tolB protein-related	-1.29036	0.00592105
255812_at	AT4G10310	HKT1 (HIGH-AFFINITY K+ TRANSPORTER 1); sodium ion transmembrane transporter	-1.02579	0.0284848
256252_at	AT3G11340	UDP-glucoronosyl/UDP-glucosyl transferase family protein	-1.23761	0.00686047
256321_at	AT1G55020	LOX1; lipoxygenase	-0.944944	0.0307738
256442_at	AT3G10930	unknown protein	-0.962468	0.0360825
256453_at	AT1G75270	DHAR2 (DEHYDROASCORBATE REDUCTASE 2); glutathione binding / glutathione dehydrogenase (ascorbate)	-0.810569	0.0446748
256522_at	AT1G66160	U-box domain-containing protein	-0.917641	0.0375229
256563_at	AT3G29780	RALFL27 (ralf-like 27); signal transducer	-1.01713	0.0286585
256576_at	AT3G28210	PMZ; zinc ion binding	-1.4482	0.00311475
256589_at	AT3G28740	CYP81D1; electron carrier/ heme binding / iron ion binding / monooxygenase/ oxygen binding	-4.2733	0
256593_at	AT3G28510	AAA-type ATPase family protein	-0.959986	0.0259494
256617_at	AT3G22240	unknown protein	-0.861628	0.0472549
256647_at	AT3G13610	oxidoreductase, 2OG-Fe(II) oxygenase family protein	-0.932432	0.0308235
256877_at	AT3G26470	FUNCTIONS IN: molecular_function unknown; INVOLVED IN: biological_process unknown; LOCATED IN: cellular_component unknown; EXPRESSED IN: 8 plant structures; EXPRESSED DURING: 4 anthesis, LP.04 four leaves visible, petal differentiation and expansion stage	-1.10608	0.0136522
256933_at	AT3G22600	protease inhibitor/seed storage/lipid transfer protein (LTP) family protein	-0.885372	0.0360526
256937_at	AT3G22620	protease inhibitor/seed storage/lipid transfer protein (LTP) family protein	-0.969057	0.023871
257062_at	AT3G18290	EMB2454 (embryo defective 2454); protein binding / zinc ion binding	-1.56851	0.00203704
257076_at	AT3G19680	unknown protein	-1.14173	0.0204795
257135_at	AT3G12900	oxidoreductase, 2OG-Fe(II) oxygenase family protein	-1.07238	0.0182857
257216_at	AT3G14990	4-methyl-5(b-hydroxyethyl)-thiazole monophosphate biosynthesis protein, putative	-0.951668	0.0279375
257217_at	AT3G14940	ATPPC3 (PHOSPHOENOLPYRUVATE CARBOXYLASE 3); phosphoenolpyruvate carboxylase	-0.879553	0.0396507
257421_at	AT1G12030	unknown protein	-1.74609	0.000465116
257481_at	AT1G08430	ALMT1 (ALUMINUM-ACTIVATED MALATE TRANSPORTER 1); malate transmembrane transporter	-1.83371	0
257645_at	AT3G25790	myb family transcription factor	-0.992787	0.0237908
257697_at	AT3G12700	aspartyl protease family protein	-0.8263	0.0393991
257823_at	AT3G25190	nodulin, putative	-1.1803	0.0202069
257830_at	AT3G26690	ATNUDX13 (ARABIDOPSIS THALIANA NUDIX HYDROLASE HOMOLOG 13); bis(5'-adenosyl)-pentaphosphatase/ hydrolase	-1.11336	0.0137069
258033_at	AT3G21250	ATMRP6; ATPase, coupled to transmembrane movement of substances	-0.884628	0.0368246
258063_at	AT3G14620	CYP72A8; electron carrier/ heme binding / iron ion binding / monooxygenase/ oxygen binding	-1.2012	0.0149167
258064_at	AT3G14680	CYP72A14; electron carrier/ heme binding / iron ion binding / monooxygenase/ oxygen binding	-0.938631	0.0288889
258107_at	AT3G23560	ALF5 (ABERRANT LATERAL ROOT FORMATION 5); antiporter/ drug transporter/ transporter	-1.48549	0.00267857
258114_at	AT3G14660	CYP72A13; electron carrier/ heme binding / iron ion binding / monooxygenase/ oxygen binding	-0.852677	0.0371163
258498_at	AT3G02480	ABA-responsive protein-related	-2.19971	0.00104167
258815_at	AT3G04000	short-chain dehydrogenase/reductase (SDR) family protein	-1.01477	0.0289441
258957_at	AT3G01420	DOX1; lipoxygenase	-1.8453	0.00030303
259036_at	AT3G09220	LAC7 (laccase 7); laccase	-0.873636	0.0453414
259040_at	AT3G09270	ATGSTU8 (GLUTATHIONE S-TRANSFERASE TAU 8); glutathione transferase	-1.31541	0.00597222
259478_at	AT1G18980	germin-like protein, putative	-1.5586	0.00156863
259481_at	AT1G18970	GLP4 (GERMIN-LIKE PROTEIN 4); manganese ion binding / nutrient reservoir	-1.70496	0.000652174
259632_at	AT1G56430	NAS4 (NICOTIANAMINE SYNTHASE 4); nicotianamine synthase	-1.31598	0.00694118
259685_at	AT1G63090	AtPP2-A11 (Phloem protein 2-A11); carbohydrate binding	-0.87345	0.0484231
259705_at	AT1G77450	anac032 (Arabidopsis NAC domain containing protein 32); transcription factor	-1.67033	0.00263158
259729_at	AT1G77640	AP2 domain-containing transcription factor, putative	-1.13529	0.0120561
259850_at	AT1G72240	unknown protein	-0.950965	0.0359162
259875_s_at	AT1G76680;AT1G76690	[AT1G76680, OPR1; 12-oxophytodienoate reductase];[AT1G76690, OPR2]	-1.83688	0
259911_at	AT1G72680	cinnamyl-alcohol dehydrogenase, putative	-1.30889	0.00594595
259953_at	AT1G74810	BOR5; anion exchanger	-1.40882	0.00558824
259980_at	AT1G76520	auxin efflux carrier family protein	-1.12358	0.0121698
260097_at	AT1G73220	AtOCT1 (Arabidopsis thaliana ORGANIC CATION/CARNITINE TRANSPORTER1); carbohydrate transmembrane transporter/ carnitine transporter/ transporter	-1.10097	0.0231579
260225_at	AT1G74590	GSTU10 (GLUTATHIONE S-TRANSFERASE TAU 10); glutathione transferase	-1.27776	0.00947917
260230_at	AT1G74500	bHLH family protein	-0.89707	0.0357672
260261_at	AT1G68450	VQ motif-containing protein	-1.12952	0.0126606
260517_at	AT1G51420	SPP1 (SUCROSE-PHOSPHATASE 1); catalytic/ magnesium ion binding / phosphatase/ sucrose-phosphatase	-1.86677	0
260551_at	AT2G43510	ATTI1; serine-type endopeptidase inhibitor	-1.76288	0.000512821
260746_at	AT1G78380	ATGSTU19 (GLUTATHIONE S-TRANSFERASE TAU 19); glutathione binding / glutathione transferase	-0.859895	0.0365714
260803_at	AT1G78340	ATGSTU22 (GLUTATHIONE S-TRANSFERASE TAU 22); glutathione transferase	-2.15099	0
260840_at	AT1G29050	unknown protein	-1.03955	0.0205442
260856_at	AT1G21910	AP2 domain-containing transcription factor family protein	-1.74463	0.000526316
260932_s_at	AT1G02530;AT1G02520	[AT1G02530, PGP12 (P-GLYCOPROTEIN 12); ATPase, coupled to transmembrane movement of substances];[AT1G02520, PGP11 (P-GLYCOPROTEIN 11); ATPase, coupled to transmembrane movement of substances]	-1.19564	0.00835165
260943_at	AT1G45145	ATTRX5; oxidoreductase, acting on sulfur group of donors, disulfide as acceptor	-0.884734	0.0367961
261006_at	AT1G26410	FAD-binding domain-containing protein	-0.97494	0.0362376
261020_at	AT1G26390	FAD-binding domain-containing protein	-2.08996	0
261023_at	AT1G12200	flavin-containing monooxygenase family protein / FMO family protein	-0.934984	0.0317341
261443_at	AT1G28480	GRX480; electron carrier/ protein disulfide oxidoreductase	-0.905635	0.0325862
261509_at	AT1G71740	unknown protein	-0.910242	0.034382
261658_at	AT1G50040	unknown protein	-1.25662	0.00904255
261684_at	AT1G47400	unknown protein	-4.0941	0
261691_at	AT1G50060	pathogenesis-related protein, putative	-0.947402	0.0301796
261806_at	AT1G30510	ATRFNR2 (ROOT FNR 2); FAD binding / NADP or NADPH binding / electron carrier/ ferredoxin-NADP+ reductase/ oxidoreductase	-1.12018	0.0136283
261899_at	AT1G80820	CCR2 (CINNAMOYL COA REDUCTASE); cinnamoyl-CoA reductase	-0.880004	0.0489015
261926_at	AT1G22530	PATL2 (PATELLIN 2); transporter	-0.862206	0.0427386
261984_at	AT1G33760	AP2 domain-containing transcription factor, putative	-1.85267	0.000277778
262118_at	AT1G02850	BGLU11 (BETA GLUCOSIDASE 11); catalytic/ cation binding / hydrolase, hydrolyzing O-glycosyl compounds	-2.24891	0
262128_at	AT1G52690	late embryogenesis abundant protein, putative / LEA protein, putative	-0.862206	0.0345
262133_at	AT1G78000	SULTR1;2 (SULFATE TRANSPORTER 1;2); sulfate transmembrane transporter	-0.879813	0.0359701
262218_at	AT1G74770	protein binding / zinc ion binding	-0.880402	0.0363158
262229_at	AT1G68620	hydrolase	-1.06863	0.0354595
262336_at	AT1G64220	TOM7-2 (TRANSLOCASE OF OUTER MEMBRANE 7 KDA SUBUNIT 2); P-P-bond-hydrolysis-driven protein transmembrane transporter	-0.912055	0.0348901
262373_at	AT1G73120	unknown protein	-1.60669	0.00288136
262381_at	AT1G72900	disease resistance protein (TIR-NBS class), putative	-1.85365	0
262482_at	AT1G17020	SRG1 (SENESCENCE-RELATED GENE 1); oxidoreductase, acting on diphenols and related substances as donors, oxygen as acceptor / oxidoreductase, acting on paired donors, with incorporation or reduction of molecular oxygen, 2-oxoglutarate as one donor, and inc	-0.976551	0.0332955
262517_at	AT1G17180	ATGSTU25 (GLUTATHIONE S-TRANSFERASE TAU 25); glutathione transferase	-3.12631	0
262518_at	AT1G17170	ATGSTU24 (GLUTATHIONE S-TRANSFERASE TAU 24); glutathione binding / glutathione transferase	-2.80385	0
262607_at	AT1G13990	unknown protein	-0.928444	0.0396522
262653_at	AT1G14130	2-oxoglutarate-dependent dioxygenase, putative	-0.87638	0.03595
262832_s_at	AT1G14870;AT1G14880	[AT1G14870, FUNCTIONS IN: molecular_function unknown; INVOLVED IN: response to oxidative stress; LOCATED IN: plasma membrane; EXPRESSED IN: callus; CONTAINS InterPro DOMAIN/s: EGF-type aspartate/asparagine hydroxylation conserved site (InterPro:IPR000152)	-1.03056	0.0176259
262930_at	AT1G65690	harpin-induced protein-related / HIN1-related / harpin-responsive protein-related	-1.10485	0.0137719
262935_at	AT1G79410	AtOCT5 (Arabidopsis thaliana ORGANIC CATION/CARNITINE TRANSPORTER5); carbohydrate transmembrane transporter/ sugar:hydrogen symporter	-1.69128	0.00047619
263005_at	AT1G54540	FUNCTIONS IN: molecular_function unknown; INVOLVED IN: biological_process unknown; LOCATED IN: cellular_component unknown; EXPRESSED IN: hypocotyl, flower, root; EXPRESSED DURING: petal differentiation and expansion stage; CONTAINS InterPro DOMAIN/s: Harp	-0.910075	0.0364423
263046_at	AT2G05380	GRP3S (GLYCINE-RICH PROTEIN 3 SHORT ISOFORM)	-1.07071	0.0155285
263073_at	AT2G17500	auxin efflux carrier family protein	-0.941666	0.0346961
263184_at	AT1G05560	UGT75B1 (UDP-GLUCOSYLTRANSFERASE 75B1); UDP-glucose:4-aminobenzoate acylglucosyltransferase/ UDP-glucosyltransferase/ UDP-glycosyltransferase/ abscisic acid glucosyltransferase/ transferase, transferring glycosyl groups	-1.63243	0.000666667
263227_at	AT1G30750	unknown protein	-1.16885	0.0113131
263231_at	AT1G05680	UDP-glucoronosyl/UDP-glucosyl transferase family protein	-3.45468	0
263284_at	AT2G36100	integral membrane family protein	-0.946332	0.0310526
263403_at	AT2G04040	TX1; antiporter/ multidrug efflux pump/ multidrug transporter/ transporter	-0.804621	0.0473123
263421_at	AT2G17230	EXL5 (EXORDIUM LIKE 5)	-1.01506	0.0341899
263437_at	AT2G28670	disease resistance-responsive family protein / fibroin-related	-0.891527	0.0355376
263473_at	AT2G31750	UGT74D1 (UDP-glucosyl transferase 74D1); UDP-glycosyltransferase/ abscisic acid glucosyltransferase/ transferase, transferring glycosyl groups / transferase, transferring hexosyl groups	-0.843418	0.0384091
263481_at	AT2G04025	unknown protein	-0.7946	0.0490672
263904_at	AT2G36380	PDR6; ATPase, coupled to transmembrane movement of substances	-0.828377	0.0409705
263985_at	AT2G42750	DNAJ heat shock N-terminal domain-containing protein	-0.903169	0.0363547
264005_at	AT2G22470	AGP2 (ARABINOGALACTAN PROTEIN 2)	-1.23278	0.00761364
264010_at	AT2G21100	disease resistance-responsive protein-related / dirigent protein-related	-1.14895	0.0135135
264506_at	AT1G09560	GLP5 (GERMIN-LIKE PROTEIN 5); manganese ion binding / nutrient reservoir	-0.876873	0.0367925
264514_at	AT1G09500	cinnamyl-alcohol dehydrogenase family / CAD family	-1.61046	0.0060274
264580_at	AT1G05340	unknown protein	-1.00419	0.0373148
264708_at	AT1G09740	ethylene-responsive protein, putative	-0.812868	0.049084
264716_at	AT1G70170	MMP (MATRIX METALLOPROTEINASE); metalloendopeptidase/ metallopeptidase	-0.781681	0.0490226
264751_at	AT1G23020	FRO3; ferric-chelate reductase	-1.75988	0.0005
264912_at	AT1G60750	oxidoreductase	-1.20937	0.00822222
264929_at	AT1G60730	aldo/keto reductase family protein	-1.11378	0.0136364
265050_at	AT1G52070	jacalin lectin family protein	-0.999012	0.0231333
265200_s_at	AT2G36800;AT2G36790	[AT2G36800, DOGT1 (DON-GLUCOSYLTRANSFERASE 1); UDP-glycosyltransferase/ cis-zeatin O-beta-D-glucosyltransferase/ glucosyltransferase/ quercetin 4'-O-glucosyltransferase/ quercetin 7-O-glucosyltransferase/ trans-zeatin O-beta-D-glucosyltransferase/ transfe	-1.07464	0.0149587
265260_at	AT2G43000	anac042 (Arabidopsis NAC domain containing protein 42); transcription factor	-1.09444	0.0188652
265499_at	AT2G15480	UGT73B5 (UDP-glucosyl transferase 73B5); UDP-glucosyltransferase/ UDP-glycosyltransferase/ quercetin 3-O-glucosyltransferase/ transferase, transferring glycosyl groups	-1.36516	0.00412698
265501_at	AT2G15490	UGT73B4 (UDP-GLYCOSYLTRANSFERASE 73B4); UDP-glucosyltransferase/ UDP-glycosyltransferase/ quercetin 3-O-glucosyltransferase/ quercetin 7-O-glucosyltransferase/ transferase, transferring glycosyl groups	-2.57789	0
265674_at	no_match	no_match	-1.3441	0.0057971
265920_s_at	AT2G15120;AT2G15220	[AT2G15120, pseudogene, disease-resistance family protein / fatty acid elongase-related, similar to fatty acid elongase 1 (FAE1) (Arabidopsis thaliana) GI:881615; similar to NtPRp27 (GI:5360263) (Nicotiana tabacum)similar to R 14 protein (GI:27764542) (Gl	-1.61058	0.00236364
266066_at	AT2G18800	XTH21 (XYLOGLUCAN ENDOTRANSGLUCOSYLASE/HYDROLASE 21); hydrolase, acting on glycosyl bonds / xyloglucan endotransglucosylase	-0.917379	0.0352174
266155_at	no_match	no_match	-1.11477	0.0160156
266181_at	AT2G02390	ATGSTZ1 (ARABIDOPSIS THALIANA GLUTATHIONE S-TRANSFERASE ZETA 1); catalytic/ glutathione transferase	-1.09088	0.0154032
266267_at	AT2G29460	ATGSTU4 (ARABIDOPSIS THALIANA GLUTATHIONE S-TRANSFERASE TAU 4); glutathione transferase	-1.0268	0.0237179
266269_at	AT2G29480	ATGSTU2 (ARABIDOPSIS THALIANA GLUTATHIONE S-TRANSFERASE TAU 2); glutathione transferase	-1.06115	0.0162016
266290_at	AT2G29490	ATGSTU1 (GLUTATHIONE S-TRANSFERASE TAU 1); glutathione transferase	-2.07076	0
266292_at	AT2G29350	SAG13; alcohol dehydrogenase/ oxidoreductase	-1.43038	0.00602564
266294_at	AT2G29500	17.6 kDa class I small heat shock protein (HSP17.6B-CI)	-1.6319	0.00605634
266296_at	AT2G29420	ATGSTU7 (ARABIDOPSIS THALIANA GLUTATHIONE S-TRANSFERASE TAU 7); glutathione transferase	-1.64829	0.000454545
266316_at	AT2G27080	harpin-induced protein-related / HIN1-related / harpin-responsive protein-related	-1.16368	0.0171324
266356_at	AT2G32300	UCC1 (UCLACYANIN 1); copper ion binding / electron carrier	-1.04429	0.0172464
266368_at	AT2G41380	embryo-abundant protein-related	-1.78894	0.000294118
266712_at	AT2G46750	FAD-binding domain-containing protein	-0.973137	0.0366184
266941_at	AT2G18980	peroxidase, putative	-1.14087	0.0121359
267101_at	AT2G41480	electron carrier/ heme binding / peroxidase	-0.949396	0.0415481
267168_at	AT2G37770	aldo/keto reductase family protein	-2.2741	0
267181_at	AT2G37760	aldo/keto reductase family protein	-1.34959	0.0061039
267300_at	AT2G30140	UDP-glucoronosyl/UDP-glucosyl transferase family protein	-0.852008	0.0478295
267393_at	AT2G44500	unknown protein	-0.877014	0.0479377
267451_at	AT2G33710	AP2 domain-containing transcription factor family protein	-0.823205	0.0431818
267565_at	AT2G30750	CYP71A12 (cytochrome P450, family 71, subfamily A, polypeptide 12); electron carrier/ heme binding / iron ion binding / monooxygenase/ oxygen binding	-1.22424	0.0122857

## Sheet: 1 hpi Up-regulated
ID Affymetrix	Locus	Description	Fold change (Log2)	p-value
244933_at	ATCG01070	NADH dehydrogenase ND4L	0.777762	0.0320482
244938_at	ATCG01120	encodes a chloroplast ribosomal protein S15, a constituent of the small subunit of the ribosomal complex	0.886764	0.01945
244959_s_at	AT2G07708;ATMG00500; ATMG00490	[AT2G07708, unknown protein];[ATMG00500, hypothetical protein];[ATMG00490, hypothetical protein]	1.06938	0.010813
244970_at	ATCG00660	encodes a chloroplast ribosomal protein L20, a constituent of the large subunit of the ribosomal complex	0.959031	0.0153012
244972_at	ATCG00680	encodes for CP47, subunit of the photosystem II reaction center,	1.13674	0.00707547
244973_at	ATCG00690	Encodes photosystem II 5 kD protein subunit PSII-T, This is a plastid-encoded gene (PsbTc) which also has a nuclear-encoded paralog (PsbTn),	0.831459	0.0257391
244974_at	ATCG00700	PSII low MW protein	0.902484	0.0216444
244989_s_at	ATCG00860;ATCG01280	[ATCG00860, Encodes an unknown protein, This gene is regulated by AtSIG6 transcriptionally,];[ATCG01280, hypothetical protein]	1.08544	0.00930435
244990_s_at	ATCG00870;ATCG01270	[ATCG00870, hypothetical protein];[ATCG01270, hypothetical protein]	0.976852	0.0150909
244991_s_at	ATCG01250;ATCG00890	[ATCG01250, NADH dehydrogenase ND2];[ATCG00890, NADH dehydrogenase ND2]	0.772178	0.0432526
244995_at	ATCG00150	Encodes a subunit of ATPase complex CF0, which is a proton channel that supplies the proton motive force to drive ATP synthesis by CF1 portion of the complex,	0.732725	0.0474455
245010_at	ATCG00420	Encodes NADH dehydrogenase subunit J, Its transcription is increased upon sulfur depletion,	0.747808	0.0408541
245011_at	ATCG00430	Encodes a protein which was originally thought to be part of photosystem II but its wheat homolog was later shown to encode for subunit K of NADH dehydrogenase,	0.801071	0.0320565
245025_at	ATCG00130	ATPase F subunit,	0.731176	0.0435017
245038_at	AT2G26560	PLA2A (PHOSPHOLIPASE A 2A); lipase/ nutrient reservoir	1.1813	0.0173295
245052_at	AT2G26440	pectinesterase family protein	1.29329	0.00721154
245148_at	AT2G45220	pectinesterase family protein	1.43347	0.00663366
245186_at	AT1G67710	ARR11 (RESPONSE REGULATOR 11); transcription factor/ two-component response regulator	0.876145	0.0216216
245266_at	AT4G17070	peptidyl-prolyl cis-trans isomerase	0.757224	0.0454221
245329_at	AT4G14365	zinc finger (C3HC4-type RING finger) family protein / ankyrin repeat family protein	1.63666	0.00195652
245566_at	AT4G14610	pseudogene, disease resistance protein (CC-NBS-LRR class), putative, domain signature CC-NBS-LRR exists, suggestive of a disease resistance protein,; blastp match of 45% identity and 2,2e-162 P-value to GP|24461866|gb|AAN62353,1|AF506028_20|AF506028 NBS-L	0.995637	0.0173143
245668_at	AT1G28330	DYL1 (DORMANCY-ASSOCIATED PROTEIN-LIKE 1)	1.34548	0.00319444
245706_at	AT5G04310	pectate lyase family protein	0.787287	0.0349412
245874_at	no_match	no_match	1.81391	0.000357143
245885_at	AT5G09440	EXL4 (EXORDIUM LIKE 4)	1.07761	0.0114925
246028_at	AT5G21170	5'-AMP-activated protein kinase beta-2 subunit, putative	0.831789	0.0304184
246099_at	AT5G20230	ATBCB (ARABIDOPSIS BLUE-COPPER-BINDING PROTEIN); copper ion binding / electron carrier	1.5204	0.00552083
246108_at	AT5G28630	glycine-rich protein	0.755725	0.0446405
246238_at	AT4G36670	mannitol transporter, putative	1.7096	0.00290323
246251_at	AT4G37220	stress-responsive protein, putative	1.17919	0.00656863
246366_at	AT1G51850	leucine-rich repeat protein kinase, putative	1.7259	0.00342105
246368_at	AT1G51890	leucine-rich repeat protein kinase, putative	0.98243	0.0337052
246755_at	AT5G27920	F-box family protein	0.907356	0.0185714
246777_at	AT5G27420	zinc finger (C3HC4-type RING finger) family protein	1.09973	0.0112308
246831_at	AT5G26340	MSS1; carbohydrate transmembrane transporter/ hexose:hydrogen symporter/ high-affinity hydrogen:glucose symporter/ sugar:hydrogen symporter	1.54147	0.0030303
246927_s_at	AT5G25260;AT5G25250	[AT5G25260, FUNCTIONS IN: molecular_function unknown; INVOLVED IN: biological_process unknown; LOCATED IN: plasma membrane; EXPRESSED IN: cultured cell; CONTAINS InterPro DOMAIN/s: Band 7 protein (InterPro:IPR001107); BEST Arabidopsis thaliana protein mat	1.74977	0.00196078
246943_at	AT5G25440	protein kinase family protein	0.84883	0.0440656
247297_at	AT5G64100	peroxidase, putative	2.30912	0
247324_at	AT5G64190	unknown protein	0.840926	0.0378277
247326_at	AT5G64110	peroxidase, putative	0.789767	0.0481231
247327_at	AT5G64120	peroxidase, putative	2.22214	0
247524_at	AT5G61440	ACHT5 (ATYPICAL CYS HIS RICH THIOREDOXIN 5)	0.740598	0.0434228
247604_at	AT5G60950	COBL5 (COBRA-LIKE PROTEIN 5 PRECURSOR)	0.714409	0.0450814
247685_at	AT5G59680	leucine-rich repeat protein kinase, putative	0.833885	0.034252
247734_at	AT5G59400	unknown protein	0.76167	0.0464968
247924_at	AT5G57655	xylose isomerase family protein	0.952989	0.0186598
247954_at	AT5G56870	BGAL4 (beta-galactosidase 4); beta-galactosidase	1.80461	0.000555556
248050_at	AT5G56100	glycine-rich protein / oleosin	1.26355	0.0051087
248092_at	AT5G55170	SUMO3 (SMALL UBIQUITIN-LIKE MODIFIER 3); protein binding / protein tag	0.725715	0.0418947
248193_at	AT5G54080	HGO (HOMOGENTISATE 1,2-DIOXYGENASE); homogentisate 1,2-dioxygenase	0.814417	0.0383582
248306_at	AT5G52830	WRKY27; transcription factor	0.787284	0.0382657
248347_at	AT5G52250	transducin family protein / WD-40 repeat family protein	0.986747	0.0164118
248377_at	AT5G51720	unknown protein	2.74782	0
248491_at	AT5G51010	rubredoxin family protein	0.785887	0.0421875
248551_at	AT5G50200	WR3 (WOUND-RESPONSIVE 3); nitrate transmembrane transporter	1.26258	0.00740741
248606_at	AT5G49450;AT5G49448	[AT5G49450, AtbZIP1 (Arabidopsis thaliana basic leucine-zipper 1); DNA binding / protein heterodimerization/ transcription factor];[AT5G49448, CPuORF4 (Conserved peptide upstream open reading frame 4)]	0.782657	0.0470886
248703_at	AT5G48430	aspartic-type endopeptidase	2.27537	0
248793_at	AT5G47240	atnudt8 (Arabidopsis thaliana Nudix hydrolase homolog 8); hydrolase	0.956611	0.0149383
248910_at	AT5G45820	CIPK20 (CBL-INTERACTING PROTEIN KINASE 20); kinase/ protein serine/threonine kinase	1.42709	0.00229508
248943_s_at	AT5G45490;AT5G45440	[AT5G45490, disease resistance protein-related];[AT5G45440, disease resistance protein-related]	0.696594	0.0494328
249032_at	AT5G44910	Toll-Interleukin-Resistance (TIR) domain-containing protein	1.52155	0.00233333
249045_at	AT5G44380	FAD-binding domain-containing protein	0.947477	0.016131
249097_at	AT5G43520	DC1 domain-containing protein	1.75077	0.0003125
249206_at	AT5G42630	ATS (ABERRANT TESTA SHAPE); DNA binding / transcription factor	0.924444	0.0175281
249337_at	AT5G41080	glycerophosphoryl diester phosphodiesterase family protein	1.7192	0.000540541
249346_at	AT5G40780	LHT1; amino acid transmembrane transporter	2.13363	0
249364_at	AT5G40590	DC1 domain-containing protein	1.35177	0.00548387
249454_at	AT5G39520	unknown protein	1.07971	0.0365
249459_at	AT5G39580	peroxidase, putative	1.19457	0.0203431
249477_s_at	AT5G38940;AT5G38930	[AT5G38940, manganese ion binding / nutrient reservoir];[AT5G38930, germin-like protein, putative]	0.719487	0.0441118
249485_at	AT5G39020	protein kinase family protein	0.944613	0.0172989
249755_at	AT5G24580	copper-binding family protein	0.80513	0.0265086
249783_at	AT5G24270	SOS3 (SALT OVERLY SENSITIVE 3); calcium ion binding / calcium-dependent protein serine/threonine phosphatase	0.793358	0.04075
249932_at	AT5G22390	unknown protein	0.959851	0.0177419
250032_at	AT5G18170	GDH1 (GLUTAMATE DEHYDROGENASE 1); ATP binding / glutamate dehydrogenase [NAD(P)+]/ oxidoreductase	1.12549	0.00738739
250073_at	AT5G17170	ENH1 (enhancer of sos3-1); electron carrier/ metal ion binding / protein binding	1.16081	0.00733945
250145_at	AT5G14690	unknown protein	0.695456	0.0481173
250155_at	AT5G15160	bHLH family protein	1.04441	0.0115441
250182_at	AT5G14470	GHMP kinase-related	1.06323	0.0218502
250471_at	AT5G10170	MIPS3 (MYO-INOSITOL-1-PHOSTPATE SYNTHASE 3); binding / catalytic/ inositol-3-phosphate synthase	0.847904	0.0214932
250580_at	AT5G07440	GDH2 (GLUTAMATE DEHYDROGENASE 2); ATP binding / glutamate dehydrogenase [NAD(P)+]/ glutamate dehydrogenase/ oxidoreductase	0.848711	0.0376426
250649_at	AT5G06690	WCRKC1 (WCRKC THIOREDOXIN 1)	1.1294	0.00922414
250666_at	AT5G07100	WRKY26; transcription factor	1.50747	0.00477778
250680_at	AT5G06570	hydrolase	1.43083	0.00222222
250697_at	AT5G06800	myb family transcription factor	0.799818	0.0358203
250940_at	AT5G03310	auxin-responsive family protein	0.900546	0.0202844
250971_at	AT5G02810	PRR7 (PSEUDO-RESPONSE REGULATOR 7); transcription regulator/ two-component response regulator	0.90835	0.0203333
251013_at	AT5G02540	short-chain dehydrogenase/reductase (SDR) family protein	0.907842	0.0279574
251109_at	AT5G01600	ATFER1; ferric iron binding / iron ion binding	1.55907	0.00390244
251144_at	AT5G01210	transferase family protein	0.85986	0.0301681
251196_at	AT3G62950	glutaredoxin family protein	1.22194	0.00636364
251243_at	AT3G61870	unknown protein	0.759435	0.0418881
251356_at	AT3G61060	AtPP2-A13 (Arabidopsis thaliana phloem protein 2-A13); carbohydrate binding	1.52273	0.00191489
251420_at	AT3G60490	AP2 domain-containing transcription factor TINY, putative	1.03798	0.0111024
251789_at	AT3G55450	protein kinase, putative	0.783653	0.0366284
251832_at	AT3G55150	ATEXO70H1 (exocyst subunit EXO70 family protein H1); protein binding	0.86653	0.0459486
251906_at	AT3G53720	ATCHX20 (CATION/H+ EXCHANGER 20); monovalent cation:proton antiporter/ sodium:hydrogen antiporter	0.728268	0.0479331
251919_at	AT3G53800	armadillo/beta-catenin repeat family protein	1.04707	0.0116296
252036_at	AT3G52070	unknown protein	0.829608	0.0313525
252076_at	AT3G51660	macrophage migration inhibitory factor family protein / MIF family protein	0.742552	0.0471384
252170_at	AT3G50480	HR4 (HOMOLOG OF RPW8 4)	1.4722	0.00308824
252183_at	AT3G50740	UGT72E1 (UDP-glucosyl transferase 72E1); UDP-glycosyltransferase/ coniferyl-alcohol glucosyltransferase/ transferase, transferring glycosyl groups	1.049	0.0150311
252234_at	AT3G49780	ATPSK4 (PHYTOSULFOKINE 4 PRECURSOR); growth factor	0.954174	0.0212442
252300_at	AT3G49160	pyruvate kinase family protein	3.1752	0
252346_at	AT3G48650	pseudogene, At14a-related protein, similar to At14a (GI:11994571 and GI:11994573) (Arabidopsis thaliana)	0.733774	0.0434114
252415_at	AT3G47340	ASN1 (GLUTAMINE-DEPENDENT ASPARAGINE SYNTHASE 1); asparagine synthase (glutamine-hydrolyzing)	1.09414	0.0177297
252464_at	AT3G47160	protein binding / zinc ion binding	0.800892	0.037803
252484_at	AT3G46690	UDP-glucoronosyl/UDP-glucosyl transferase family protein	1.08255	0.0134899
252511_at	AT3G46280	protein kinase-related	3.51291	0
252549_at	AT3G45860	receptor-like protein kinase, putative	0.923755	0.036332
252554_s_at	AT3G46330;AT3G45920	[AT3G46330, MEE39 (maternal effect embryo arrest 39); kinase];[AT3G45920, receptor protein kinase-related]	0.702177	0.0472871
252698_at	AT3G43670	copper amine oxidase, putative	1.25174	0.00483146
252859_at	AT4G39780	AP2 domain-containing transcription factor, putative	1.11228	0.0113768
252916_at	AT4G38950	kinesin motor family protein	0.712762	0.0479817
252976_s_at	AT4G38550	LOCATED IN: chloroplast; EXPRESSED IN: 21 plant structures; EXPRESSED DURING: 13 growth stages; CONTAINS InterPro DOMAIN/s: Phospholipase-like, arabidopsis (InterPro:IPR007942); BEST Arabidopsis thaliana protein match is: unknown protein (TAIR:AT2G20950,1	0.951837	0.0176536
252991_at	AT4G38470	protein kinase family protein	0.761048	0.0435135
253126_at	AT4G36050	endonuclease/exonuclease/phosphatase family protein	1.20252	0.0056383
253161_at	AT4G35770	SEN1 (SENESCENCE 1)	0.972131	0.0202927
253301_at	AT4G33720	pathogenesis-related protein, putative	1.34788	0.00328767
253392_at	AT4G32650	ATKC1 (ARABIDOPSIS THALIANA K+ RECTIFYING CHANNEL 1); cyclic nucleotide binding / inward rectifier potassium channel	0.955073	0.0305417
253401_at	AT4G32870	unknown protein	1.8145	0.000285714
253414_at	AT4G33050	EDA39 (embryo sac development arrest 39); calmodulin binding	1.058	0.0180851
253454_at	AT4G31875	unknown protein	0.987881	0.0134483
253722_at	AT4G29190	zinc finger (CCCH-type) family protein	0.759804	0.0384191
253749_at	AT4G29080	PAP2 (PHYTOCHROME-ASSOCIATED PROTEIN 2); transcription factor	0.689512	0.048982
253871_at	AT4G27440	PORB (PROTOCHLOROPHYLLIDE OXIDOREDUCTASE B); oxidoreductase/ protochlorophyllide reductase	0.935808	0.0162791
253971_at	AT4G26530	fructose-bisphosphate aldolase, putative	1.00882	0.0135135
253998_at	AT4G26010	peroxidase, putative	1.05731	0.0115909
253999_at	AT4G26200	ACS7; 1-aminocyclopropane-1-carboxylate synthase	1.79449	0.00285714
254093_at	AT4G25110	AtMC2 (metacaspase 2); cysteine-type endopeptidase	1.26021	0.00557895
254098_at	AT4G25100	FSD1 (FE SUPEROXIDE DISMUTASE 1); copper ion binding / superoxide dismutase	0.780074	0.0379323
254174_at	AT4G24120	YSL1 (YELLOW STRIPE LIKE 1); oligopeptide transporter	0.826412	0.0399639
254243_at	AT4G23210	protein kinase family protein	1.11421	0.0212963
254266_at	AT4G23130	CRK5 (CYSTEINE-RICH RLK5); kinase	0.776191	0.049009
254314_at	AT4G22470	protease inhibitor/seed storage/lipid transfer protein (LTP) family protein	2.65362	0
254361_at	AT4G22212	Encodes a defensin-like (DEFL) family protein,	0.928527	0.0187435
254410_at	AT4G21410	protein kinase family protein	0.802349	0.0384783
254453_at	AT4G21120	AAT1 (AMINO ACID TRANSPORTER 1); L-glutamate transmembrane transporter/ L-lysine transmembrane transporter/ arginine transmembrane transporter/ cationic amino acid transmembrane transporter	1.48072	0.0035443
254522_at	AT4G19980	unknown protein	0.707261	0.0480745
254524_at	AT4G20000	VQ motif-containing protein	1.09693	0.01875
254644_at	AT4G18510	CLE2 (CLAVATA3/ESR-RELATED); protein binding / receptor binding	1.24522	0.00388235
254652_at	AT4G18170	WRKY28; transcription factor	0.936335	0.0383704
254764_at	AT4G13250	short-chain dehydrogenase/reductase (SDR) family protein	1.36415	0.00307692
254805_at	AT4G12480	pEARLI 1; lipid binding	2.84234	0
254818_at	AT4G12470	protease inhibitor/seed storage/lipid transfer protein (LTP) family protein	3.99286	0
254819_at	AT4G12500	protease inhibitor/seed storage/lipid transfer protein (LTP) family protein	3.68639	0
254828_at	AT4G12550	AIR1; lipid binding	2.26967	0
254832_at	AT4G12490	protease inhibitor/seed storage/lipid transfer protein (LTP) family protein	4.17999	0
254869_at	AT4G11890	protein kinase family protein	1.09226	0.0171676
255148_at	AT4G08470	MAPKKK10; ATP binding / kinase/ protein kinase/ protein serine/threonine kinase	0.930215	0.0194472
255160_at	AT4G07820	pathogenesis-related protein, putative	1.39089	0.00237288
255305_at	AT4G04770	ATABC1 (ATP BINDING CASSETTE PROTEIN 1); ATPase, coupled to transmembrane movement of substances / protein binding / transporter	0.892404	0.0213761
255310_at	AT4G04955	ATALN (Arabidopsis allantoinase); allantoinase/ hydrolase	1.25153	0.00409091
255319_at	AT4G04220	AtRLP46 (Receptor Like Protein 46); kinase/ protein binding	0.714323	0.0458387
255381_at	AT4G03510	RMA1; protein binding / ubiquitin-protein ligase/ zinc ion binding	1.37541	0.00346154
255516_at	AT4G02270	pollen Ole e 1 allergen and extensin family protein	0.74226	0.0472187
255517_at	AT4G02290	AtGH9B13 (Arabidopsis thaliana glycosyl hydrolase 9B13); catalytic/ hydrolase, hydrolyzing O-glycosyl compounds	0.868224	0.0207944
255595_at	AT4G01700	chitinase, putative	1.15592	0.0114599
255596_at	AT4G01720	WRKY47; transcription factor	0.782604	0.0480488
255733_at	AT1G25400	unknown protein	1.25248	0.00738318
256020_at	AT1G58290	HEMA1; glutamyl-tRNA reductase	0.900032	0.0203349
256131_at	AT1G13600	AtbZIP58 (Arabidopsis thaliana basic leucine-zipper 58); DNA binding / protein heterodimerization/ protein homodimerization/ transcription factor	0.77462	0.0407168
256169_at	AT1G51800	leucine-rich repeat protein kinase, putative	1.10573	0.0219027
256170_at	AT1G51790	kinase	1.36155	0.00622449
256177_at	AT1G51620	protein kinase family protein	0.986109	0.0401079
256192_at	AT1G30110	ATNUDX25 (ARABIDOPSIS THALIANA NUDIX HYDROLASE HOMOLOG 25); bis(5'-nucleosyl)-tetraphosphatase (asymmetrical)	0.918232	0.0228821
256300_at	AT1G69490	NAP (NAC-like, activated by AP3/PI); transcription factor	1.01646	0.0186528
256337_at	AT1G72060	serine-type endopeptidase inhibitor	1.81556	0.00075
256349_at	AT1G54890	late embryogenesis abundant protein-related / LEA protein-related	0.834987	0.0316667
256433_at	AT3G10985	SAG20 (SENESCENCE ASSOCIATED GENE 20)	0.782797	0.0437294
256469_at	AT1G32540	LOL1 (LSD ONE LIKE 1); DNA binding	1.0806	0.0128671
256736_at	AT3G29410	terpene synthase/cyclase family protein	1.25689	0.0056701
256743_at	AT3G29370	unknown protein	0.993406	0.0133987
256766_at	AT3G22231	PCC1 (PATHOGEN AND CIRCADIAN CONTROLLED 1)	0.943313	0.0188832
256774_at	AT3G13760	DC1 domain-containing protein	1.38629	0.0028125
256787_at	AT3G13790	ATBFRUCT1; beta-fructofuranosidase/ hydrolase, hydrolyzing O-glycosyl compounds	0.970681	0.0176796
256965_at	AT3G13450	DIN4 (DARK INDUCIBLE 4); 3-methyl-2-oxobutanoate dehydrogenase (2-methylpropanoyl-transferring)/ catalytic	1.03544	0.0135099
256969_at	AT3G21080	ABC transporter-related	0.986737	0.0202956
257061_at	AT3G18250	unknown protein	1.12091	0.0184656
257206_at	AT3G16530	legume lectin family protein	1.68883	0.000526316
257373_at	AT2G43140	DNA binding / transcription factor	1.99291	0
257479_at	AT1G16150	WAKL4 (WALL ASSOCIATED KINASE-LIKE 4); kinase	1.44716	0.00323944
257504_at	AT1G52240	ROPGEF11 (RHO GUANYL-NUCLEOTIDE EXCHANGE FACTOR 11); Rho guanyl-nucleotide exchange factor	1.46188	0.001875
257623_at	AT3G26210	CYP71B23; electron carrier/ heme binding / iron ion binding / monooxygenase/ oxygen binding	1.63013	0.00328571
257624_at	AT3G26220	CYP71B3; electron carrier/ heme binding / iron ion binding / monooxygenase/ oxygen binding	1.44326	0.00413793
257625_at	AT3G26230	CYP71B24; electron carrier/ heme binding / iron ion binding / monooxygenase/ oxygen binding	1.20928	0.0133562
257636_at	AT3G26200	CYP71B22; electron carrier/ heme binding / iron ion binding / monooxygenase/ oxygen binding	1.95731	0.00037037
257670_at	AT3G20340	Expression of the gene is downregulated in the presence of paraquat, an inducer of photoxidative stress,	1.1704	0.0129286
257805_at	AT3G18830	ATPLT5 (POLYOL TRANSPORTER 5); D-ribose transmembrane transporter/ D-xylose transmembrane transporter/ carbohydrate transmembrane transporter/ galactose transmembrane transporter/ glucose transmembrane transporter/ glycerol transmembrane transporter/ mann	0.833616	0.031157
257939_at	AT3G19930	STP4 (SUGAR TRANSPORTER 4); carbohydrate transmembrane transporter/ monosaccharide transmembrane transporter/ sucrose:hydrogen symporter/ sugar:hydrogen symporter	1.37673	0.00375
258005_at	AT3G19390	cysteine proteinase, putative / thiol protease, putative	0.968181	0.0144654
258225_at	AT3G15630	unknown protein	1.57627	0.00186047
258227_at	AT3G15620	UVR3 (UV REPAIR DEFECTIVE 3); DNA (6-4) photolyase	0.746011	0.0481734
258339_at	AT3G16120	dynein light chain, putative	0.989987	0.0135374
258362_at	AT3G14280	unknown protein	0.761538	0.0461859
258395_at	AT3G15500	ANAC055 (ARABIDOPSIS NAC DOMAIN CONTAINING PROTEIN 55); transcription factor	0.852184	0.038315
258419_at	AT3G16670	unknown protein	1.06847	0.0128369
258434_at	AT3G16770	ATEBP (ETHYLENE-RESPONSIVE ELEMENT BINDING PROTEIN); DNA binding / protein binding / transcription activator/ transcription factor	0.820971	0.0342688
258527_at	AT3G06850	BCE2; acetyltransferase/ alpha-ketoacid dehydrogenase/ dihydrolipoamide branched chain acyltransferase	1.06755	0.0110156
258809_at	AT3G04070	anac047 (Arabidopsis NAC domain containing protein 47); transcription factor	2.15526	0
258856_at	AT3G02040	SRG3 (senescence-related gene 3); glycerophosphodiester phosphodiesterase/ phosphoric diester hydrolase	0.98684	0.0138854
259120_at	AT3G02240	unknown protein	1.13226	0.0206103
259211_at	AT3G09020	alpha 1,4-glycosyltransferase family protein / glycosyltransferase sugar-binding DXD motif-containing protein	1.08927	0.00814159
259272_at	AT3G01290	band 7 family protein	0.818017	0.0434333
259365_at	AT1G13300	myb family transcription factor	0.867287	0.0203883
259466_at	AT1G19050	ARR7 (RESPONSE REGULATOR 7); transcription regulator/ two-component response regulator	0.78391	0.0434364
259502_at	AT1G15670	kelch repeat-containing F-box family protein	0.902205	0.0357977
259517_at	AT1G20630	CAT1 (CATALASE 1); catalase	1.06568	0.0115789
259544_at	AT1G20620	CAT3 (CATALASE 3); catalase	1.01311	0.0115827
259561_at	AT1G21250	WAK1 (CELL WALL-ASSOCIATED KINASE); kinase	0.840728	0.0382156
259694_at	AT1G63180	UGE3 (UDP-D-glucose/UDP-D-galactose 4-epimerase 3); UDP-glucose 4-epimerase/ protein dimerization	0.96838	0.017663
259723_at	AT1G60960	IRT3; cation transmembrane transporter/ metal ion transmembrane transporter	1.00074	0.015061
259737_at	AT1G64400	long-chain-fatty-acid--CoA ligase, putative / long-chain acyl-CoA synthetase, putative	0.904187	0.0380377
259841_at	AT1G52200	unknown protein	1.42285	0.00304348
259871_at	AT1G76800	nodulin, putative	1.22343	0.0064
259925_at	AT1G75040	PR5 (PATHOGENESIS-RELATED GENE 5)	1.07154	0.0091453
259977_at	AT1G76590	zinc-binding family protein	1.19743	0.00776786
259982_at	AT1G76410	ATL8; protein binding / zinc ion binding	1.17607	0.00991525
260101_at	AT1G73260	trypsin and protease inhibitor family protein / Kunitz family protein	0.839531	0.0433219
260150_at	AT1G52820	2-oxoglutarate-dependent dioxygenase, putative	1.95856	0
260181_at	AT1G70710	ATGH9B1 (ARABIDOPSIS THALIANA GLYCOSYL HYDROLASE 9B1); cellulase/ hydrolase, hydrolyzing O-glycosyl compounds	0.714487	0.0435548
260220_at	AT1G74650	MYB31 (MYB DOMAIN PROTEIN 31); DNA binding / transcription factor	1.10136	0.0133766
260405_at	AT1G69930	ATGSTU11 (GLUTATHIONE S-TRANSFERASE TAU 11); glutathione transferase	1.23117	0.0163158
260536_at	AT2G43400	ETFQO (electron-transfer flavoprotein:ubiquinone oxidoreductase); catalytic/ electron carrier/ electron-transferring-flavoprotein dehydrogenase	0.786221	0.0437086
260546_at	AT2G43520	ATTI2; serine-type endopeptidase inhibitor	0.904996	0.0177596
260556_at	AT2G43620	chitinase, putative	3.31488	0
260662_at	AT1G19540	isoflavone reductase, putative	1.5704	0.00142857
260668_at	AT1G19530	unknown protein	1.76993	0.00121951
260741_at	AT1G15040	glutamine amidotransferase-related	2.12277	0
260754_at	AT1G49000	unknown protein	0.931478	0.0188421
260783_at	AT1G06160	ORA59 (OCTADECANOID-RESPONSIVE ARABIDOPSIS AP2/ERF 59); DNA binding / transcription activator/ transcription factor	0.978463	0.0176374
260869_at	AT1G43800	acyl-(acyl-carrier-protein) desaturase, putative / stearoyl-ACP desaturase, putative	2.86249	0
260900_s_at	AT5G34780;AT1G21400	[AT5G34780, dehydrogenase E1 component family protein];[AT1G21400, 2-oxoisovalerate dehydrogenase, putative / 3-methyl-2-oxobutanoate dehydrogenase, putative / branched-chain alpha-keto acid dehydrogenase E1 alpha subunit, putative]	1.12169	0.0175706
260914_at	AT1G02640	BXL2 (BETA-XYLOSIDASE 2); hydrolase, hydrolyzing O-glycosyl compounds	1.07831	0.0130556
260915_at	AT1G02660	lipase class 3 family protein	0.770859	0.0493155
261005_at	AT1G26420	FAD-binding domain-containing protein	1.65576	0.00232143
261021_at	AT1G26380	FAD-binding domain-containing protein	1.26603	0.00894737
261135_at	AT1G19610	PDF1.4	3.99048	0
261254_at	AT1G05805	basic helix-loop-helix (bHLH) family protein	1.06596	0.01112
261339_at	AT1G35710	leucine-rich repeat transmembrane protein kinase, putative	1.26048	0.00483516
261453_at	AT1G21130	O-methyltransferase, putative	1.0324	0.0134211
261459_at	AT1G21100	O-methyltransferase, putative	1.38396	0.00727273
261567_at	AT1G33055	unknown protein	0.950421	0.0186667
261927_at	AT1G22500	zinc finger (C3HC4-type RING finger) family protein	0.921163	0.0203846
261956_at	AT1G64590	short-chain dehydrogenase/reductase (SDR) family protein	0.998726	0.0418118
262119_s_at	AT1G02930;AT1G02920	[AT1G02930, ATGSTF6 (GLUTATHIONE S-TRANSFERASE); copper ion binding / glutathione binding / glutathione transferase];[AT1G02920, GSTF7; copper ion binding / glutathione binding / glutathione transferase]	0.921136	0.041338
262254_at	AT1G53920	GLIP5; carboxylesterase/ lipase	0.865693	0.0216143
262388_at	AT1G49320	BURP domain-containing protein	0.70903	0.0463492
262503_at	AT1G21670	INVOLVED IN: proteolysis; LOCATED IN: cell wall, plant-type cell wall; EXPRESSED IN: 23 plant structures; EXPRESSED DURING: 14 growth stages; CONTAINS InterPro DOMAIN/s: WD40-like Beta Propeller (InterPro:IPR011659), Peptidase S9B, dipeptidylpeptidase IV	0.985123	0.0272532
262643_at	AT1G62770	invertase/pectin methylesterase inhibitor family protein	1.26946	0.0039759
262727_at	AT1G75800	pathogenesis-related thaumatin family protein	0.708058	0.0479091
262805_at	AT1G20900	ESC (ESCAROLA); double-stranded DNA binding	0.958029	0.0165089
262838_at	AT1G14960	major latex protein-related / MLP-related	0.808182	0.0257576
262899_at	AT1G59870	PEN3 (PENETRATION 3); ATPase, coupled to transmembrane movement of substances / cadmium ion transmembrane transporter	0.783491	0.0434471
263098_at	AT2G16005	MD-2-related lipid recognition domain-containing protein / ML domain-containing protein	1.37088	0.019403
263106_at	AT2G05160	zinc finger (CCCH-type) family protein / RNA recognition motif (RRM)-containing protein	0.996673	0.0143038
263118_at	AT1G03090	MCCA; methylcrotonoyl-CoA carboxylase	1.18919	0.00714286
263126_at	AT1G78460	SOUL heme-binding family protein	0.857851	0.0288136
263133_at	AT1G78450	SOUL heme-binding family protein	1.04805	0.0108871
263194_at	AT1G36060	AP2 domain-containing transcription factor, putative	0.904257	0.0433793
263216_s_at	AT1G30720;AT1G30730	[AT1G30720, FAD-binding domain-containing protein];[AT1G30730, FAD-binding domain-containing protein]	2.2212	0
263443_at	AT2G28630	KCS12 (3-KETOACYL-COA SYNTHASE 12); acyltransferase/ catalytic/ transferase, transferring acyl groups other than amino-acyl groups	1.71377	0.000769231
263460_at	AT2G31810	acetolactate synthase small subunit, putative	0.907236	0.0198515
263498_at	AT2G42610	LSH10 (LIGHT SENSITIVE HYPOCOTYLS 10)	1.0405	0.0112214
263549_at	AT2G21650	MEE3 (MATERNAL EFFECT EMBRYO ARREST 3); DNA binding / transcription factor	2.10801	0
263765_at	AT2G21540	SFH3 (SEC14-LIKE 3); phosphatidylinositol transporter	0.808301	0.0304149
263831_at	AT2G40300	ATFER4 (ferritin 4); binding / ferric iron binding / oxidoreductase/ transition metal ion binding	1.5331	0.00181818
263836_at	AT2G40330	Bet v I allergen family protein	0.925522	0.0213488
263840_at	AT2G36885	unknown protein	1.26139	0.00395062
263901_at	AT2G36320	zinc finger (AN1-like) family protein	0.762057	0.0470219
263937_at	AT2G35910	zinc finger (C3HC4-type RING finger) family protein	0.780426	0.0414134
263981_at	AT2G42870	PAR1 (PHY RAPIDLY REGULATED 1)	0.899961	0.0203774
264045_at	AT2G22450	riboflavin biosynthesis protein, putative	0.783687	0.0321457
264195_at	AT1G22690	gibberellin-responsive protein, putative	0.754556	0.0466134
264200_at	AT1G22650	beta-fructofuranosidase, putative / invertase, putative / saccharase, putative / beta-fructosidase, putative	0.789539	0.0383212
264238_at	AT1G54740	FUNCTIONS IN: molecular_function unknown; INVOLVED IN: biological_process unknown; EXPRESSED IN: 21 plant structures; EXPRESSED DURING: 14 growth stages; BEST Arabidopsis thaliana protein match is: structural constituent of ribosome (TAIR:AT1G22110,1); Ha	0.816629	0.0435254
264246_at	AT1G60140	ATTPS10 (trehalose phosphate synthase); transferase, transferring glycosyl groups / trehalose-phosphatase	0.767901	0.0487349
264346_at	AT1G12010	1-aminocyclopropane-1-carboxylate oxidase, putative / ACC oxidase, putative	1.30113	0.00324324
264434_at	AT1G10340	ankyrin repeat family protein	1.97619	0.000344828
264482_at	AT1G77210	sugar transporter, putative	0.97095	0.0177222
264524_at	AT1G10070	ATBCAT-2 (ARABIDOPSIS THALIANA BRANCHED-CHAIN AMINO ACID TRANSAMINASE 2); branched-chain-amino-acid transaminase/ catalytic	1.80717	0.00241379
264561_at	AT1G55810	uracil phosphoribosyltransferase, putative / UMP pyrophosphorylase, putative / UPRTase, putative	0.980112	0.015509
264567_s_at	AT1G05250;AT1G05240	[AT1G05250, peroxidase, putative];[AT1G05240, peroxidase, putative]	1.32333	0.0032
264574_at	AT1G05300	ZIP5; cation transmembrane transporter/ metal ion transmembrane transporter	1.88351	0.000322581
264616_at	AT2G17740	DC1 domain-containing protein	3.56779	0
264635_at	AT1G65500	unknown protein	1.7543	0.00207547
264647_at	AT1G09090	ATRBOHB (respiratory burst oxidase homolog B); FAD binding / calcium ion binding / electron carrier/ iron ion binding / oxidoreductase/ oxidoreductase, acting on NADH or NADPH, with oxygen as acceptor / peroxidase	0.890954	0.0203865
264757_at	AT1G61360	S-locus lectin protein kinase family protein	0.781455	0.0483384
264777_at	AT1G08630	THA1 (Threonine Aldolase 1); aldehyde-lyase/ threonine aldolase	1.62798	0.00392857
264788_at	AT2G17880	DNAJ heat shock protein, putative	1.10859	0.00983471
264923_s_at	AT1G65970;AT1G60740	[AT1G65970, TPX2 (thioredoxin-dependent peroxidase 2); antioxidant/ oxidoreductase];[AT1G60740, peroxiredoxin type 2, putative]	1.13002	0.0111111
264960_at	AT1G76930	ATEXT4 (EXTENSIN 4); structural constituent of cell wall	1.29928	0.00991667
265031_at	AT1G61590	protein kinase, putative	0.713311	0.0480675
265070_at	AT1G55510	BCDH BETA1 (BRANCHED-CHAIN ALPHA-KETO ACID DECARBOXYLASE E1 BETA SUBUNIT); 3-methyl-2-oxobutanoate dehydrogenase (2-methylpropanoyl-transferring)/ catalytic	0.76709	0.0455663
265136_at	AT1G51270	structural molecule/ transmembrane receptor	0.810546	0.0375573
265208_at	AT2G36690	oxidoreductase, 2OG-Fe(II) oxygenase family protein	2.43311	0
265471_at	AT2G37130	peroxidase 21 (PER21) (P21) (PRXR5)	1.73194	0.000294118
265478_at	AT2G15890	MEE14 (maternal effect embryo arrest 14)	1.05348	0.0110853
265536_at	AT2G15880	leucine-rich repeat family protein / extensin family protein	0.828102	0.0278632
265588_at	AT2G19970	pathogenesis-related protein, putative	1.14251	0.00983193
265611_at	AT2G25510	unknown protein	1.00645	0.0136
265660_at	AT2G25470	AtRLP21 (Receptor Like Protein 21); protein binding	0.862172	0.0415603
265722_at	AT2G40100	LHCB4,3 (light harvesting complex PSII); chlorophyll binding	0.873392	0.0213242
265893_at	AT2G15042	protein binding	0.891225	0.0214091
265917_at	AT2G15080	AtRLP19 (Receptor Like Protein 19); kinase/ protein binding	0.983659	0.014908
266017_at	AT2G18690	unknown protein	1.57507	0.00236364
266070_at	AT2G18660	EXLB3 (EXPANSIN-LIKE B3 PRECURSOR)	1.38775	0.00395349
266125_at	AT2G45050	zinc finger (GATA type) family protein	0.788211	0.03236
266168_at	AT2G38870	protease inhibitor, putative	1.15407	0.0128873
266247_at	AT2G27660	DC1 domain-containing protein	1.00426	0.0192929
266276_at	AT2G29330	TRI (tropinone reductase); binding / catalytic/ oxidoreductase	0.929975	0.0176471
266330_at	AT2G01530	MLP329 (MLP-LIKE PROTEIN 329); copper ion binding	1.20199	0.00669903
266383_at	AT2G14580	ATPRB1	1.13548	0.00983607
266393_at	AT2G41260	M17	1.87799	0.00192308
266670_at	AT2G29740	UGT71C2 (UDP-GLUCOSYL TRANSFERASE 71C2); UDP-glycosyltransferase/ quercetin 3'-O-glucosyltransferase/ quercetin 3-O-glucosyltransferase/ quercetin 7-O-glucosyltransferase/ transferase, transferring glycosyl groups	0.804563	0.0384727
266695_at	AT2G19810	zinc finger (CCCH-type) family protein	0.797035	0.0433333
266746_s_at	AT2G02930;AT4G02520	[AT2G02930, ATGSTF3 (GLUTATHIONE S-TRANSFERASE F3); glutathione transferase];[AT4G02520, ATGSTF2 (GLUTATHIONE S-TRANSFERASE PHI 2); glutathione binding / glutathione transferase]	0.858841	0.0287342
266800_at	AT2G22880	VQ motif-containing protein	1.17851	0.0139744
266967_at	AT2G39530	integral membrane protein, putative	1.004	0.0217411
266992_at	AT2G39200	MLO12 (MILDEW RESISTANCE LOCUS O 12); calmodulin binding	2.45891	0
266993_at	AT2G39210	nodulin family protein	1.54819	0.00313433
267035_at	AT2G38400	AGT3 (ALANINE:GLYOXYLATE AMINOTRANSFERASE 3); alanine-glyoxylate transaminase/ catalytic/ pyridoxal phosphate binding / transaminase	0.912935	0.0222807
267045_at	AT2G34180	CIPK13 (CBL-INTERACTING PROTEIN KINASE 13); ATP binding / kinase/ protein kinase/ protein serine/threonine kinase	1.33375	0.00350649
267076_at	AT2G41090	calmodulin-like calcium-binding protein, 22 kDa (CaBP-22)	1.03593	0.014875
267178_at	AT2G37750	unknown protein	0.802081	0.034127
267384_at	AT2G44370	DC1 domain-containing protein	2.28324	0
267385_at	AT2G44380	DC1 domain-containing protein	1.50492	0.00245614
267436_at	AT2G19190	FRK1 (FLG22-INDUCED RECEPTOR-LIKE KINASE 1); kinase	2.0928	0.000333333
267461_at	AT2G33830	dormancy/auxin associated family protein	1.86396	0.00030303
267477_at	AT2G02710	PLPB (PAS/LOV PROTEIN B); signal transducer/ two-component sensor	0.839272	0.0311934
267523_at	AT2G30600	BTB/POZ domain-containing protein	0.841981	0.0363953
267524_at	AT2G30600	BTB/POZ domain-containing protein	0.862651	0.0317143
267626_at	AT2G42250	CYP712A1; electron carrier/ heme binding / iron ion binding / monooxygenase/ oxygen binding	1.54953	0.00183673

## Sheet: 1 hpi Down-regulated
ID Affymetrix	Locus	Description	Fold change (Log2)	p-value
245296_at	AT4G16370	ATOPT3 (OLIGOPEPTIDE TRANSPORTER); oligopeptide transporter	-1.71334	0.000571429
245306_at	AT4G14690	ELIP2 (EARLY LIGHT-INDUCIBLE PROTEIN 2); chlorophyll binding	-1.44224	0.00205479
245352_at	AT4G15490	UGT84A3; UDP-glycosyltransferase/ sinapate 1-glucosyltransferase/ transferase, transferring glycosyl groups	-1.45705	0.00166667
245385_at	AT4G14020	rapid alkalinization factor (RALF) family protein	-0.838671	0.0321875
245422_at	AT4G17470	palmitoyl protein thioesterase family protein	-0.821287	0.0281068
245627_at	AT1G56600	AtGolS2 (Arabidopsis thaliana galactinol synthase 2); transferase, transferring glycosyl groups / transferase, transferring hexosyl groups	-1.3472	0.00202703
245692_at	AT5G04150	BHLH101; DNA binding / transcription factor	-3.72601	0
245816_at	AT1G26210	unknown protein	-0.782489	0.0377432
245936_at	AT5G19850	hydrolase, alpha/beta fold family protein	-0.750634	0.0477256
245982_at	AT5G13170	SAG29 (SENESCENCE-ASSOCIATED PROTEIN 29)	-2.30494	0
246250_at	AT4G36880	CP1 (CYSTEINE PROTEINASE1); cysteine-type endopeptidase/ cysteine-type peptidase	-1.11175	0.00983471
246273_at	AT4G36700	cupin family protein	-3.42951	0
246310_at	AT3G51895	SULTR3;1 (SULFATE TRANSPORTER 3;1); secondary active sulfate transmembrane transporter/ sulfate transmembrane transporter/ transporter	-0.822641	0.0316895
246429_at	AT5G17450	heavy-metal-associated domain-containing protein / copper chaperone (CCH)-related	-0.948393	0.0147945
246463_at	AT5G16970	AT-AER (alkenal reductase); 2-alkenal reductase	-0.909976	0.0243784
246464_at	AT5G16980	NADP-dependent oxidoreductase, putative	-1.086	0.0123308
246481_s_at	AT5G15960;AT5G15970	[AT5G15960, KIN1];[AT5G15970, KIN2]	-0.891798	0.0301402
246490_at	AT5G15950;AT5G15948	[AT5G15950, adenosylmethionine decarboxylase family protein];[AT5G15948, CPuORF10 (Conserved peptide upstream open reading frame 10)]	-0.897034	0.0272772
246554_at	AT5G15450	CLPB3 (CASEIN LYTIC PROTEINASE B3); ATP binding / ATPase/ nucleoside-triphosphatase/ nucleotide binding / protein binding	-0.814371	0.031422
246789_at	AT5G27600	LACS7 (LONG-CHAIN ACYL-COA SYNTHETASE 7); long-chain-fatty-acid-CoA ligase/ protein binding	-0.838146	0.0316364
246908_at	AT5G25610	RD22; nutrient reservoir	-1.26511	0.00348837
246932_at	AT5G25190	ethylene-responsive element-binding protein, putative	-0.790789	0.0359919
246998_at	AT5G67370	unknown protein	-1.59674	0.000652174
247095_at	AT5G66400	RAB18 (RESPONSIVE TO ABA 18)	-2.69918	0
247218_at	AT5G65010	ASN2 (ASPARAGINE SYNTHETASE 2); asparagine synthase (glutamine-hydrolyzing)	-0.875154	0.0361847
247351_at	AT5G63790	ANAC102 (ARABIDOPSIS NAC DOMAIN CONTAINING PROTEIN 102); transcription factor	-1.01647	0.00983333
247486_at	AT5G62140	unknown protein	-0.818562	0.034875
247488_at	AT5G61820	FUNCTIONS IN: molecular_function unknown; INVOLVED IN: biological_process unknown; LOCATED IN: vacuole; EXPRESSED IN: 24 plant structures; EXPRESSED DURING: 15 growth stages; CONTAINS InterPro DOMAIN/s: Stress up-regulated Nod 19 (InterPro:IPR011692); Has	-1.71374	0.0005
247511_at	AT5G62040	brother of FT and TFL1 protein (BFT)	-0.790396	0.0318552
247655_at	AT5G59820	RHL41 (RESPONSIVE TO HIGH LIGHT 41); nucleic acid binding / transcription factor/ zinc ion binding	-0.889412	0.0211111
247704_at	AT5G59510	RTFL5 (ROTUNDIFOLIA LIKE 5)	-0.874259	0.0255789
247717_at	AT5G59320	LTP3 (LIPID TRANSFER PROTEIN 3); lipid binding	-3.55831	0
247718_at	AT5G59310	LTP4 (LIPID TRANSFER PROTEIN 4); lipid binding	-4.52548	0
247723_at	AT5G59220	protein phosphatase 2C, putative / PP2C, putative	-0.97016	0.0344206
248048_at	AT5G56080	NAS2 (NICOTIANAMINE SYNTHASE 2); nicotianamine synthase	-2.50745	0
248178_at	AT5G54370	late embryogenesis abundant protein-related / LEA protein-related	-1.03825	0.0178981
248236_at	AT5G53870	plastocyanin-like domain-containing protein	-0.992861	0.0341739
248243_at	AT5G53590;AT5G53588	[AT5G53590, auxin-responsive family protein];[AT5G53588, CPuORF50 (Conserved peptide upstream open reading frame 50)]	-0.725174	0.0426692
248270_at	AT5G53450	ORG1 (OBP3-responsive gene 1); ATP binding / kinase/ protein kinase	-1.99345	0
248352_at	AT5G52300	LTI65 (LOW-TEMPERATURE-INDUCED 65)	-1.72628	0.000526316
248607_at	AT5G49480	ATCP1 (Ca2+-binding protein 1); calcium ion binding	-1.35547	0.00202899
248729_at	AT5G48010	THAS1 (THALIANOL SYNTHASE 1); catalytic/ thalianol synthase	-1.40439	0.00180328
248921_at	AT5G45950	GDSL-motif lipase/hydrolase family protein	-0.915594	0.0188608
249063_at	AT5G44110	POP1; transporter	-0.797879	0.0345259
249191_at	AT5G42760	INVOLVED IN: biological_process unknown; LOCATED IN: cellular_component unknown; EXPRESSED IN: 21 plant structures; EXPRESSED DURING: 13 growth stages; CONTAINS InterPro DOMAIN/s: Conserved hypothetical protein CHP00027, methylltransferase (InterPro:IPR0	-0.996357	0.0107087
249410_at	AT5G40380	protein kinase family protein	-1.07764	0.00785714
249476_at	AT5G38910	germin-like protein, putative	-1.2854	0.00889831
249575_at	AT5G37670	15,7 kDa class I-related small heat shock protein-like (HSP15,7-CI)	-0.98806	0.0289904
249583_at	AT5G37770	TCH2 (TOUCH 2); calcium ion binding	-0.729121	0.0475899
249622_at	AT5G37550	unknown protein	-0.829334	0.0313364
249752_at	AT5G24660	LSU2 (RESPONSE TO LOW SULFUR 2)	-1.07089	0.0147917
249797_at	AT5G23750	remorin family protein	-1.37336	0.00171875
249917_at	AT5G22460	esterase/lipase/thioesterase family protein	-1.09795	0.00703704
249942_at	AT5G22300	NIT4 (NITRILASE 4); 3-cyanoalanine hydratase/ cyanoalanine nitrilase/ indole-3-acetonitrile nitrilase/ nitrilase/ nitrile hydratase	-0.989968	0.0115504
250083_at	AT5G17220	ATGSTF12 (ARABIDOPSIS THALIANA GLUTATHIONE S-TRANSFERASE PHI 12); glutathione transferase	-0.841193	0.0268657
250230_at	AT5G13900	protease inhibitor/seed storage/lipid transfer protein (LTP) family protein	-0.783239	0.0394231
250252_at	AT5G13750	ZIFL1 (ZINC INDUCED FACILITATOR-like 1); tetracycline:hydrogen antiporter	-0.925861	0.0166013
250261_at	AT5G13400	proton-dependent oligopeptide transport (POT) family protein	-0.827154	0.0255385
250293_s_at	AT5G13370;AT5G13360	[AT5G13370, auxin-responsive GH3 family protein];[AT5G13360, auxin-responsive GH3 family protein]	-0.846635	0.0296682
250296_at	AT5G12020	HSP17,6II (17,6 KDA CLASS II HEAT SHOCK PROTEIN)	-1.73175	0.00283951
250351_at	AT5G12030	AT-HSP17,6A (ARABIDOPSIS THALIANA HEAT SHOCK PROTEIN 17,6A); unfolded protein binding	-1.66955	0.00291139
250478_at	AT5G10250	DOT3 (DEFECTIVELY ORGANIZED TRIBUTARIES 3); protein binding / signal transducer	-0.901819	0.0221302
250598_at	AT5G07690	ATMYB29 (ARABIDOPSIS THALIANA MYB DOMAIN PROTEIN 29); DNA binding / transcription factor	-1.09251	0.00727273
250648_at	AT5G06760	late embryogenesis abundant group 1 domain-containing protein / LEA group 1 domain-containing protein	-0.880577	0.0479286
250670_at	AT5G06860	PGIP1 (POLYGALACTURONASE INHIBITING PROTEIN 1); protein binding	-0.719349	0.0491724
250690_at	AT5G06530	ABC transporter family protein	-0.854919	0.0241341
250764_at	AT5G05960	protease inhibitor/seed storage/lipid transfer protein (LTP) family protein	-0.737163	0.0489965
250794_at	AT5G05270	chalcone-flavanone isomerase family protein	-1.10645	0.00698113
250828_at	AT5G05250	unknown protein	-2.67119	0
250832_at	AT5G04950	NAS1 (NICOTIANAMINE SYNTHASE 1); nicotianamine synthase	-1.57784	0.00127273
250936_at	AT5G03120	unknown protein	-1.19242	0.0047191
251221_at	AT3G62550	universal stress protein (USP) family protein	-1.34032	0.00294872
251503_at	AT3G59140	ATMRP14; ATPase, coupled to transmembrane movement of substances	-1.22818	0.00402299
251668_at	AT3G57010	strictosidine synthase family protein	-1.21678	0.00774775
251677_at	AT3G56980	BHLH039; DNA binding / transcription factor	-3.96278	0
251704_at	AT3G56360	unknown protein	-1.27246	0.00333333
251791_at	AT3G55500	ATEXPA16 (ARABIDOPSIS THALIANA EXPANSIN A16)	-1.00273	0.0166883
251928_at	AT3G53980	protease inhibitor/seed storage/lipid transfer protein (LTP) family protein	-1.82262	0.000512821
251942_at	AT3G53480	PDR9 (PLEIOTROPIC DRUG RESISTANCE 9); ATPase, coupled to transmembrane movement of substances	-0.821809	0.0289048
252168_at	AT3G50440	MES10 (METHYL ESTERASE 10); hydrolase/ hydrolase, acting on ester bonds / methyl jasmonate esterase	-0.836658	0.0362846
252209_at	AT3G50400	GDSL-motif lipase/hydrolase family protein	-1.04006	0.0107937
252269_at	AT3G49580	LSU1 (RESPONSE TO LOW SULFUR 1)	-1.79607	0
252377_at	AT3G47960	proton-dependent oligopeptide transport (POT) family protein	-0.93917	0.015102
252400_at	AT3G48020	FUNCTIONS IN: molecular_function unknown; INVOLVED IN: biological_process unknown; LOCATED IN: chloroplast; EXPRESSED IN: 11 plant structures; EXPRESSED DURING: 4 anthesis, LP,04 four leaves visible; BEST Arabidopsis thaliana protein match is: F-box famil	-0.731484	0.0413027
252414_at	AT3G47420	glycerol-3-phosphate transporter, putative / glycerol 3-phosphate permease, putative	-1.00154	0.0132353
252501_at	AT3G46880	unknown protein	-0.724825	0.0476325
252827_at	AT4G39950	CYP79B2; electron carrier/ heme binding / iron ion binding / monooxygenase/ oxygen binding	-0.933155	0.0213855
252863_at	AT4G39800	MIPS1 (MYO-INOSITOL-1-PHOSTPATE SYNTHASE 1); inositol-3-phosphate synthase	-0.794686	0.0436194
252888_at	AT4G39210	APL3; glucose-1-phosphate adenylyltransferase	-0.885957	0.0267337
252943_at	AT4G39330	CAD9 (CINNAMYL ALCOHOL DEHYDROGENASE 9); binding / catalytic/ oxidoreductase/ zinc ion binding	-0.764251	0.0442593
252983_at	AT4G37980	ELI3-1 (ELICITOR-ACTIVATED GENE 3-1); binding / catalytic/ oxidoreductase/ zinc ion binding	-0.794829	0.0308333
253050_at	AT4G37450	AGP18 (ARABINOGALACTAN PROTEIN 18)	-0.822366	0.0348536
253203_at	AT4G34710	ADC2 (ARGININE DECARBOXYLASE 2); arginine decarboxylase	-0.862258	0.0223699
253215_at	AT4G34950	nodulin family protein	-1.18261	0.0152349
253259_at	AT4G34410	RRTF1 ({REDOX RESPONSIVE TRANSCRIPTION FACTOR 1); DNA binding / transcription factor	-0.800933	0.032027
253268_s_at	AT4G34131;AT4G34135	[AT4G34131, UGT73B3 (UDP-glucosyl transferase 73B3); UDP-glycosyltransferase/ abscisic acid glucosyltransferase/ quercetin 3-O-glucosyltransferase/ transferase, transferring hexosyl groups];[AT4G34135, UGT73B2 (UDP-GLUCOSYLTRANSFERASE 73B2); UDP-glucosylt	-1.33354	0.00169231
253276_at	AT4G34050	caffeoyl-CoA 3-O-methyltransferase, putative	-0.732198	0.0476408
253343_at	AT4G33540	metallo-beta-lactamase family protein	-1.1421	0.00700935
253344_at	AT4G33550	lipid binding	-2.34312	0
253416_at	AT4G33070	pyruvate decarboxylase, putative	-1.02727	0.00991935
253502_at	AT4G31940	CYP82C4; electron carrier/ heme binding / iron ion binding / monooxygenase/ oxygen binding	-1.09988	0.0236723
253505_at	AT4G31970	CYP82C2; electron carrier/ heme binding / iron ion binding / monooxygenase/ oxygen binding	-1.89962	0.00125
253608_at	AT4G30290	XTH19 (XYLOGLUCAN ENDOTRANSGLUCOSYLASE/HYDROLASE 19); hydrolase, acting on glycosyl bonds / hydrolase, hydrolyzing O-glycosyl compounds / xyloglucan:xyloglucosyl transferase	-1.09596	0.0142029
253619_at	AT4G30460	glycine-rich protein	-0.793068	0.0360816
253643_at	AT4G29780	unknown protein	-1.13911	0.0144604
253830_at	AT4G27652	unknown protein	-0.846002	0.0272906
253841_at	AT4G27830	BGLU10 (BETA GLUCOSIDASE 10); catalytic/ cation binding / hydrolase, hydrolyzing O-glycosyl compounds	-0.945343	0.0243716
253859_at	AT4G27657	unknown protein	-1.15277	0.00585859
254020_at	AT4G25700	BETA-OHASE 1 (BETA-HYDROXYLASE 1); carotene beta-ring hydroxylase	-0.81831	0.0295775
254059_at	AT4G25200	ATHSP23,6-MITO (MITOCHONDRION-LOCALIZED SMALL HEAT SHOCK PROTEIN 23,6)	-1.28306	0.0220588
254201_at	AT4G24130	unknown protein	-0.745034	0.0474909
254232_at	AT4G23600	CORI3 (CORONATINE INDUCED 1); cystathionine beta-lyase/ transaminase	-2.31099	0
254343_at	AT4G21990	APR3 (APS REDUCTASE 3); adenylyl-sulfate reductase	-1.08358	0.00775862
254630_at	AT4G18360	(S)-2-hydroxy-acid oxidase, peroxisomal, putative / glycolate oxidase, putative / short chain alpha-hydroxy acid oxidase, putative	-0.782383	0.0376953
254642_at	AT4G18810	binding / catalytic/ transcription repressor	-0.758592	0.036281
254691_at	AT4G17840	unknown protein	-0.76063	0.0489931
254759_at	AT4G13180	short-chain dehydrogenase/reductase (SDR) family protein	-1.52063	0.000588235
254926_at	AT4G11280	ACS6 (1-AMINOCYCLOPROPANE-1-CARBOXYLIC ACID (ACC) SYNTHASE 6); 1-aminocyclopropane-1-carboxylate synthase	-0.878464	0.02685
254975_at	AT4G10500	oxidoreductase, 2OG-Fe(II) oxygenase family protein	-1.30485	0.00292683
255065_s_at	AT4G08870;AT4G08900	[AT4G08870, arginase, putative];[AT4G08900, arginase]	-0.901012	0.025445
255259_at	AT4G05020	NDB2 (NAD(P)H dehydrogenase B2); FAD binding / disulfide oxidoreductase/ oxidoreductase	-1.06306	0.00778761
255284_at	AT4G04610	APR1 (APS REDUCTASE 1); adenylyl-sulfate reductase	-1.21113	0.00701923
255364_s_at	AT4G22240;AT4G04020	[AT4G22240, plastid-lipid associated protein PAP, putative];[AT4G04020, FIB (FIBRILLIN); structural molecule]	-0.802873	0.0417176
255437_at	AT4G03060	AOP2 (ALKENYL HYDROXALKYL PRODUCING 2); oxidoreductase, acting on paired donors, with incorporation or reduction of molecular oxygen, 2-oxoglutarate as one donor, and incorporation of one atom each of oxygen into both donors	-1.01912	0.0115385
255462_at	AT4G02940	oxidoreductase, 2OG-Fe(II) oxygenase family protein	-0.788414	0.0346383
255521_at	AT4G02280	SUS3 (sucrose synthase 3); UDP-glycosyltransferase/ sucrose synthase/ transferase, transferring glycosyl groups	-1.63766	0.000681818
255549_at	AT4G01950	GPAT3 (GLYCEROL-3-PHOSPHATE ACYLTRANSFERASE 3); acyltransferase	-0.790047	0.03624
255773_at	AT1G18590	SOT17 (SULFOTRANSFERASE 17); desulfoglucosinolate sulfotransferase/ sulfotransferase	-0.831577	0.0266162
255795_at	AT2G33380	RD20 (RESPONSIVE TO DESSICATION 20); calcium ion binding	-2.47274	0
255811_at	AT4G10250	ATHSP22,0	-1.2325	0.00568421
255877_at	AT2G40460	proton-dependent oligopeptide transport (POT) family protein	-0.774468	0.0370472
255891_at	AT1G17870	EGY3 (ETHYLENE-DEPENDENT GRAVITROPISM-DEFICIENT AND YELLOW-GREEN-LIKE 3)	-1.83212	0
255957_at	AT1G22160	senescence-associated protein-related	-0.763786	0.0361475
256017_at	AT1G19180	JAZ1 (JASMONATE-ZIM-DOMAIN PROTEIN 1); protein binding	-0.765955	0.0425283
256252_at	AT3G11340	UDP-glucoronosyl/UDP-glucosyl transferase family protein	-0.89679	0.0211585
256356_s_at	AT5G43620;AT1G66500	[AT5G43620, S-locus protein-related];[AT1G66500, zinc finger (C2H2-type) family protein]	-0.804381	0.0346186
256453_at	AT1G75270	DHAR2 (DEHYDROASCORBATE REDUCTASE 2); glutathione binding / glutathione dehydrogenase (ascorbate)	-0.780949	0.0339648
256526_at	AT1G66090	disease resistance protein (TIR-NBS class), putative	-0.990761	0.0210303
256529_at	AT1G33260	protein kinase family protein	-0.717815	0.0489161
256576_at	AT3G28210	PMZ; zinc ion binding	-0.861684	0.032287
256577_at	AT3G28220	meprin and TRAF homology domain-containing protein / MATH domain-containing protein	-0.985391	0.0131852
256589_at	AT3G28740	CYP81D1; electron carrier/ heme binding / iron ion binding / monooxygenase/ oxygen binding	-3.16629	0
256603_at	AT3G28270	FUNCTIONS IN: molecular_function unknown; INVOLVED IN: biological_process unknown; LOCATED IN: cellular_component unknown; EXPRESSED IN: 15 plant structures; EXPRESSED DURING: 9 growth stages; CONTAINS InterPro DOMAIN/s: Protein of unknown function DUF677	-1.91566	0
256779_at	AT3G13784	AtcwINV5 (Arabidopsis thaliana cell wall invertase 5); hydrolase, hydrolyzing O-glycosyl compounds	-1.4032	0.00179104
257017_at	AT3G19620	glycosyl hydrolase family 3 protein	-1.17949	0.0061
257062_at	AT3G18290	EMB2454 (embryo defective 2454); protein binding / zinc ion binding	-1.59568	0.000638298
257066_at	AT3G18280	protease inhibitor/seed storage/lipid transfer protein (LTP) family protein	-0.737266	0.0442379
257173_at	AT3G23810	SAHH2 (S-ADENOSYL-L-HOMOCYSTEINE (SAH) HYDROLASE 2); adenosylhomocysteinase/ binding / catalytic	-0.72771	0.0479004
257217_at	AT3G14940	ATPPC3 (PHOSPHOENOLPYRUVATE CARBOXYLASE 3); phosphoenolpyruvate carboxylase	-0.833427	0.0488502
257280_at	AT3G14440	NCED3 (NINE-CIS-EPOXYCAROTENOID DIOXYGENASE 3); 9-cis-epoxycarotenoid dioxygenase	-1.19351	0.0137226
257421_at	AT1G12030	unknown protein	-2.03391	0
257481_at	AT1G08430	ALMT1 (ALUMINUM-ACTIVATED MALATE TRANSPORTER 1); malate transmembrane transporter	-1.70698	0.000697674
257644_at	AT3G25780	AOC3 (ALLENE OXIDE CYCLASE 3); allene-oxide cyclase	-0.888766	0.0216766
257666_at	AT3G20270	lipid-binding serum glycoprotein family protein	-0.797692	0.0417045
257809_at	AT3G27060	TSO2 (TSO meaning 'ugly' in Chinese); oxidoreductase/ ribonucleoside-diphosphate reductase/ transition metal ion binding	-0.821999	0.0290431
257830_at	AT3G26690	ATNUDX13 (ARABIDOPSIS THALIANA NUDIX HYDROLASE HOMOLOG 13); bis(5'-adenosyl)-pentaphosphatase/ hydrolase	-0.718235	0.0477899
257866_at	AT3G17770	dihydroxyacetone kinase family protein	-0.744127	0.0373725
257874_at	AT3G17110	pseudogene, glycine-rich protein	-0.88483	0.0333186
258033_at	AT3G21250	ATMRP6; ATPase, coupled to transmembrane movement of substances	-1.28365	0.00220779
258107_at	AT3G23560	ALF5 (ABERRANT LATERAL ROOT FORMATION 5); antiporter/ drug transporter/ transporter	-1.31226	0.00197183
258181_at	AT3G21670	nitrate transporter (NTP3)	-1.00445	0.0256085
258347_at	AT3G17520	late embryogenesis abundant domain-containing protein / LEA domain-containing protein	-2.61353	0
258452_at	AT3G22370	AOX1A (ALTERNATIVE OXIDASE 1A); alternative oxidase	-0.785138	0.0341048
258498_at	AT3G02480	ABA-responsive protein-related	-4.93684	0
258815_at	AT3G04000	short-chain dehydrogenase/reductase (SDR) family protein	-0.888959	0.0241111
258851_at	AT3G03190	ATGSTF11 (GLUTATHIONE S-TRANSFERASE F11); glutathione transferase	-1.29687	0.002875
259040_at	AT3G09270	ATGSTU8 (GLUTATHIONE S-TRANSFERASE TAU 8); glutathione transferase	-1.01412	0.0225287
259185_at	AT3G01550	PPT2 (PHOSPHOENOLPYRUVATE (PEP)/PHOSPHATE TRANSLOCATOR 2); antiporter/ triose-phosphate transmembrane transporter	-0.816546	0.0274634
259329_at	AT3G16360	AHP4 (HPT PHOSPHOTRANSMITTER 4); histidine phosphotransfer kinase/ transferase, transferring phosphorus-containing groups	-1.57833	0.000666667
259403_at	AT1G17745	PGDH (3-PHOSPHOGLYCERATE DEHYDROGENASE); phosphoglycerate dehydrogenase	-0.947481	0.0193125
259418_at	AT1G02390	GPAT2 (GLYCEROL-3-PHOSPHATE ACYLTRANSFERASE 2); acyltransferase	-1.29499	0.00213333
259432_at	AT1G01520	myb family transcription factor	-0.826396	0.0348319
259478_at	AT1G18980	germin-like protein, putative	-0.828372	0.0333778
259548_at	AT1G35260	MLP165 (MLP-LIKE PROTEIN 165)	-0.855552	0.0426217
259632_at	AT1G56430	NAS4 (NICOTIANAMINE SYNTHASE 4); nicotianamine synthase	-1.64466	0.000487805
259705_at	AT1G77450	anac032 (Arabidopsis NAC domain containing protein 32); transcription factor	-1.73623	0.000294118
259743_at	AT1G71140	MATE efflux family protein	-1.17275	0.00533333
259786_at	AT1G29660	GDSL-motif lipase/hydrolase family protein	-0.944414	0.0147552
259789_at	AT1G29395	COR414-TM1	-0.918969	0.041749
259875_s_at	AT1G76680;AT1G76690	[AT1G76680, OPR1; 12-oxophytodienoate reductase];[AT1G76690, OPR2]	-1.56467	0.000625
259911_at	AT1G72680	cinnamyl-alcohol dehydrogenase, putative	-0.992094	0.0124242
259953_at	AT1G74810	BOR5; anion exchanger	-0.975197	0.0127612
260097_at	AT1G73220	AtOCT1 (Arabidopsis thaliana ORGANIC CATION/CARNITINE TRANSPORTER1); carbohydrate transmembrane transporter/ carnitine transporter/ transporter	-1.47548	0.0012963
260248_at	AT1G74310	ATHSP101 (ARABIDOPSIS THALIANA HEAT SHOCK PROTEIN 101); ATP binding / ATPase/ nucleoside-triphosphatase/ nucleotide binding / protein binding	-0.982448	0.0342857
260261_at	AT1G68450	VQ motif-containing protein	-0.753958	0.0363347
260410_at	AT1G69870	proton-dependent oligopeptide transport (POT) family protein	-0.747616	0.0477193
260517_at	AT1G51420	SPP1 (SUCROSE-PHOSPHATASE 1); catalytic/ magnesium ion binding / phosphatase/ sucrose-phosphatase	-1.30207	0.00208333
260592_at	AT1G55850	ATCSLE1; cellulose synthase/ transferase, transferring glycosyl groups	-0.715996	0.0468864
260602_at	AT1G55920	ATSERAT2;1 (SERINE ACETYLTRANSFERASE 2;1); serine O-acetyltransferase	-0.757318	0.0477305
260744_at	AT1G15010	unknown protein	-0.833599	0.0350207
260746_at	AT1G78380	ATGSTU19 (GLUTATHIONE S-TRANSFERASE TAU 19); glutathione binding / glutathione transferase	-0.765454	0.035935
260803_at	AT1G78340	ATGSTU22 (GLUTATHIONE S-TRANSFERASE TAU 22); glutathione transferase	-1.31617	0.00301205
260955_at	AT1G06000	UDP-glucoronosyl/UDP-glucosyl transferase family protein	-0.855106	0.0339474
260957_at	AT1G06080	ADS1 (DELTA 9 DESATURASE 1); oxidoreductase	-1.13653	0.00623762
260978_at	AT1G53540	17,6 kDa class I small heat shock protein (HSP17,6C-CI) (AA 1-156)	-2.00221	0.000540541
261016_at	AT1G26560	BGLU40 (BETA GLUCOSIDASE 40); catalytic/ cation binding / hydrolase, hydrolyzing O-glycosyl compounds	-0.761897	0.0362963
261023_at	AT1G12200	flavin-containing monooxygenase family protein / FMO family protein	-0.989581	0.0110156
261065_at	AT1G07500	unknown protein	-1.25531	0.00591837
261077_at	AT1G07430	protein phosphatase 2C, putative / PP2C, putative	-1.08631	0.0261929
261177_at	AT1G04770	male sterility MS5 family protein	-0.878457	0.0218452
261224_at	AT1G20160	ATSBT5,2; identical protein binding / serine-type endopeptidase	-0.862448	0.0295755
261420_at	AT1G07720	KCS3 (3-KETOACYL-COA SYNTHASE 3); acyltransferase/ catalytic/ transferase, transferring acyl groups other than amino-acyl groups	-0.935606	0.0167097
261431_at	AT1G18710	AtMYB47 (myb domain protein 47); DNA binding / transcription factor	-1.33518	0.00341176
261443_at	AT1G28480	GRX480; electron carrier/ protein disulfide oxidoreductase	-0.786843	0.030093
261564_at	AT1G01720	ATAF1; transcription activator/ transcription factor	-0.953811	0.0144286
261569_at	AT1G01060	LHY (LATE ELONGATED HYPOCOTYL); DNA binding / transcription factor	-0.913562	0.0189308
261570_at	AT1G01120	KCS1 (3-KETOACYL-COA SYNTHASE 1); acyltransferase/ fatty acid elongase	-0.866327	0.0240449
261575_at	AT1G01130	unknown protein	-1.23079	0.00597938
261684_at	AT1G47400	unknown protein	-5.33011	0
261691_at	AT1G50060	pathogenesis-related protein, putative	-0.951329	0.0174359
261785_at	AT1G08230	amino acid transporter family protein	-1.01134	0.0148936
261838_at	AT1G16030	Hsp70b (heat shock protein 70B); ATP binding	-1.13009	0.00715596
261913_at	AT1G65860	FMO GS-OX1 (FLAVIN-MONOOXYGENASE GLUCOSINOLATE S-OXYGENASE 1); 3-methylthiopropyl glucosinolate S-oxygenase/ 4-methylthiopropyl glucosinolate S-oxygenase/ 5-methylthiopropyl glucosinolate S-oxygenase/ 6-methylthiopropyl glucosinolate S-oxygenase/ 7-methyl	-1.32222	0.00205882
262050_at	AT1G80130	binding	-1.15395	0.00604167
262098_at	AT1G56170	NF-YC2 (NUCLEAR FACTOR Y, SUBUNIT C2); DNA binding / transcription activator/ transcription factor	-0.896915	0.0222674
262118_at	AT1G02850	BGLU11 (BETA GLUCOSIDASE 11); catalytic/ cation binding / hydrolase, hydrolyzing O-glycosyl compounds	-1.99736	0
262128_at	AT1G52690	late embryogenesis abundant protein, putative / LEA protein, putative	-4.22994	0
262160_at	AT1G52590	FUNCTIONS IN: molecular_function unknown; INVOLVED IN: biological_process unknown; LOCATED IN: plastoglobule; EXPRESSED IN: 22 plant structures; EXPRESSED DURING: 13 growth stages; CONTAINS InterPro DOMAIN/s: Putative thiol-disulphide oxidoreductase DCC (	-0.748604	0.0470073
262211_at	AT1G74930	ORA47; DNA binding / transcription factor	-1.5082	0.00132075
262281_at	AT1G68570	proton-dependent oligopeptide transport (POT) family protein	-0.895401	0.0223977
262347_at	AT1G64110	AAA-type ATPase family protein	-0.98975	0.0160265
262357_at	AT1G73040	jacalin lectin family protein	-0.843633	0.0253646
262454_at	AT1G11190	BFN1 (BIFUNCTIONAL NUCLEASE I); T/G mismatch-specific endonuclease/ endoribonuclease, producing 5'-phosphomonoesters / nucleic acid binding / single-stranded DNA specific endodeoxyribonuclease	-0.85076	0.0251546
262482_at	AT1G17020	SRG1 (SENESCENCE-RELATED GENE 1); oxidoreductase, acting on diphenols and related substances as donors, oxygen as acceptor / oxidoreductase, acting on paired donors, with incorporation or reduction of molecular oxygen, 2-oxoglutarate as one donor, and inc	-1.29545	0.00210526
262517_at	AT1G17180	ATGSTU25 (GLUTATHIONE S-TRANSFERASE TAU 25); glutathione transferase	-2.95407	0
262518_at	AT1G17170	ATGSTU24 (GLUTATHIONE S-TRANSFERASE TAU 24); glutathione binding / glutathione transferase	-2.57448	0
262653_at	AT1G14130	2-oxoglutarate-dependent dioxygenase, putative	-0.808201	0.0346154
262868_at	AT1G64980	unknown protein	-1.18301	0.00554348
262911_s_at	AT1G59860;AT1G07400	[AT1G59860, 17,6 kDa class I heat shock protein (HSP17,6A-CI)];[AT1G07400, 17,8 kDa class I heat shock protein (HSP17,8-CI)]	-1.17634	0.0211656
262935_at	AT1G79410	AtOCT5 (Arabidopsis thaliana ORGANIC CATION/CARNITINE TRANSPORTER5); carbohydrate transmembrane transporter/ sugar:hydrogen symporter	-1.59851	0.0006
262940_at	AT1G79520	cation efflux family protein	-0.915232	0.0210559
263005_at	AT1G54540	FUNCTIONS IN: molecular_function unknown; INVOLVED IN: biological_process unknown; LOCATED IN: cellular_component unknown; EXPRESSED IN: hypocotyl, flower, root; EXPRESSED DURING: petal differentiation and expansion stage; CONTAINS InterPro DOMAIN/s: Harp	-0.849876	0.027971
263046_at	AT2G05380	GRP3S (GLYCINE-RICH PROTEIN 3 SHORT ISOFORM)	-0.856211	0.0377907
263115_at	AT1G03055	unknown protein	-0.842139	0.0246277
263150_at	AT1G54050	17,4 kDa class III heat shock protein (HSP17,4-CIII)	-1.26138	0.00811966
263174_at	AT1G54040	ESP (EPITHIOSPECIFIER PROTEIN); enzyme regulator	-0.933887	0.0240331
263184_at	AT1G05560	UGT75B1 (UDP-GLUCOSYLTRANSFERASE 75B1); UDP-glucose:4-aminobenzoate acylglucosyltransferase/ UDP-glucosyltransferase/ UDP-glycosyltransferase/ abscisic acid glucosyltransferase/ transferase, transferring glycosyl groups	-1.8286	0
263231_at	AT1G05680	UDP-glucoronosyl/UDP-glucosyl transferase family protein	-3.09863	0
263374_at	AT2G20560	DNAJ heat shock family protein	-0.855933	0.0452399
263473_at	AT2G31750	UGT74D1 (UDP-glucosyl transferase 74D1); UDP-glycosyltransferase/ abscisic acid glucosyltransferase/ transferase, transferring glycosyl groups / transferase, transferring hexosyl groups	-0.746909	0.0363095
263495_at	AT2G42530	COR15B (COLD REGULATED 15B)	-1.38672	0.00174603
263497_at	AT2G42540	COR15A (COLD-REGULATED 15A)	-2.99166	0
263709_at	AT1G09310	unknown protein	-0.870447	0.0254592
263739_at	AT2G21320	zinc finger (B-box type) family protein	-0.778013	0.0363306
263829_at	AT2G40435	EXPRESSED IN: 20 plant structures; EXPRESSED DURING: 13 growth stages; BEST Arabidopsis thaliana protein match is: transcription regulator (TAIR:AT3G56220,1); Has 165 Blast hits to 165 proteins in 20 species: Archae - 0; Bacteria - 0; Metazoa - 0; Fungi -	-0.783217	0.0474194
263985_at	AT2G42750	DNAJ heat shock N-terminal domain-containing protein	-1.00523	0.0122137
264005_at	AT2G22470	AGP2 (ARABINOGALACTAN PROTEIN 2)	-1.01987	0.0147586
264014_at	AT2G21210	auxin-responsive protein, putative	-1.12458	0.00696078
264146_at	AT1G02205	CER1 (ECERIFERUM 1); octadecanal decarbonylase	-1.43909	0.00118644
264147_at	AT1G02205	CER1 (ECERIFERUM 1); octadecanal decarbonylase	-1.3867	0.00177419
264217_at	AT1G60190	armadillo/beta-catenin repeat family protein / U-box domain-containing protein	-1.66978	0.00047619
264271_at	AT1G60270	pseudogene, glycosyl hydrolase family 1, contains Pfam PF00232 : Glycosyl hydrolase family 1 domain; TIGRFAM TIGR01233: 6-phospho-beta-galactosidase; similar to hydroxyisourate hydrolase (GI:19569603) (Glycine max); blastp match of 57% identity and 2,8e-1	-0.865617	0.0271569
264289_at	AT1G61890	MATE efflux family protein	-0.835663	0.0244385
264514_at	AT1G09500	cinnamyl-alcohol dehydrogenase family / CAD family	-2.28686	0
264751_at	AT1G23020	FRO3; ferric-chelate reductase	-1.13964	0.00708738
264758_at	AT1G61340	F-box family protein	-1.02477	0.00984
264940_at	AT1G60470	AtGolS4 (Arabidopsis thaliana galactinol synthase 4); transferase, transferring glycosyl groups / transferase, transferring hexosyl groups	-1.23254	0.0097541
264958_at	AT1G76960	unknown protein	-1.17082	0.00773913
265050_at	AT1G52070	jacalin lectin family protein	-0.888501	0.023125
265053_at	AT1G52000	jacalin lectin family protein	-1.58323	0.000612245
265121_at	AT1G62560	FMO GS-OX3 (FLAVIN-MONOOXYGENASE GLUCOSINOLATE S-OXYGENASE 3); 3-methylthiopropyl glucosinolate S-oxygenase/ 4-methylthiopropyl glucosinolate S-oxygenase/ 5-methylthiopropyl glucosinolate S-oxygenase/ 6-methylthiopropyl glucosinolate S-oxygenase/ 7-methyl	-0.948098	0.0245055
265200_s_at	AT2G36800;AT2G36790	[AT2G36800, DOGT1 (DON-GLUCOSYLTRANSFERASE 1); UDP-glycosyltransferase/ cis-zeatin O-beta-D-glucosyltransferase/ glucosyltransferase/ quercetin 4'-O-glucosyltransferase/ quercetin 7-O-glucosyltransferase/ trans-zeatin O-beta-D-glucosyltransferase/ transfe	-0.880358	0.0243478
265499_at	AT2G15480	UGT73B5 (UDP-glucosyl transferase 73B5); UDP-glucosyltransferase/ UDP-glycosyltransferase/ quercetin 3-O-glucosyltransferase/ transferase, transferring glycosyl groups	-1.06006	0.0077193
265501_at	AT2G15490	UGT73B4 (UDP-GLYCOSYLTRANSFERASE 73B4); UDP-glucosyltransferase/ UDP-glycosyltransferase/ quercetin 3-O-glucosyltransferase/ quercetin 7-O-glucosyltransferase/ transferase, transferring glycosyl groups	-2.27331	0
265670_s_at	AT2G32190;AT2G32210	[AT2G32190, unknown protein];[AT2G32210, unknown protein]	-1.21672	0.00574468
265674_at	no_match	no_match	-0.996056	0.0161333
265817_at	AT2G18050	HIS1-3 (HISTONE H1-3); DNA binding / nucleosomal DNA binding	-1.78554	0.00166667
265892_at	AT2G15020	unknown protein	-1.16074	0.0224571
266098_at	AT2G37870	protease inhibitor/seed storage/lipid transfer protein (LTP) family protein	-3.14356	0
266155_at	no_match	no_match	-1.21468	0.00569892
266290_at	AT2G29490	ATGSTU1 (GLUTATHIONE S-TRANSFERASE TAU 1); glutathione transferase	-1.90633	0
266294_at	AT2G29500	17,6 kDa class I small heat shock protein (HSP17,6B-CI)	-1.36922	0.0099187
266296_at	AT2G29420	ATGSTU7 (ARABIDOPSIS THALIANA GLUTATHIONE S-TRANSFERASE TAU 7); glutathione transferase	-1.50362	0.000961538
266368_at	AT2G41380	embryo-abundant protein-related	-1.42919	0.00122807
266447_at	AT2G43290	MSS3 (multicopy suppressors of snf4 deficiency in yeast 3); calcium ion binding	-0.937927	0.0163816
266462_at	AT2G47770	benzodiazepine receptor-related	-1.77337	0.000555556
266532_at	AT2G16890	UDP-glucoronosyl/UDP-glucosyl transferase family protein	-0.871733	0.0243548
266590_at	AT2G46240	BAG6 (BCL-2-ASSOCIATED ATHANOGENE 6); calmodulin binding / protein binding	-1.51359	0.00420455
266841_at	AT2G26150	ATHSFA2; DNA binding / transcription factor	-1.34573	0.00538462
267080_at	AT2G41190	amino acid transporter family protein	-1.18511	0.00890756
267101_at	AT2G41480	electron carrier/ heme binding / peroxidase	-0.930317	0.0252332
267168_at	AT2G37770	aldo/keto reductase family protein	-2.29914	0
267181_at	AT2G37760	aldo/keto reductase family protein	-1.46284	0.0012069
267256_s_at	AT2G23000;AT2G23010	[AT2G23000, scpl10 (serine carboxypeptidase-like 10); serine-type carboxypeptidase];[AT2G23010, serine carboxypeptidase S10 family protein]	-1.08248	0.00704762
267382_at	AT2G44300	lipid transfer protein-related	-0.797871	0.0345992
267411_at	AT2G34930	disease resistance family protein	-0.816397	0.0456618
267425_at	AT2G34810	FAD-binding domain-containing protein	-1.00683	0.0148592
267612_at	AT2G26690	nitrate transporter (NTP2)	-0.848855	0.0387259

## Sheet: 24 hpi Up-regulated
ID Affymetrix	Locus	Description	Fold change (Log2)	p-value
245262_at	AT4G16563	aspartyl protease family protein	0.678965	0.0472821
245276_at	AT4G16780	ATHB-2 (ARABIDOPSIS THALIANA HOMEOBOX PROTEIN 2); DNA binding / protein homodimerization/ sequence-specific DNA binding / transcription factor	0.928201	0.0107595
245325_at	AT4G14130	XTR7 (XYLOGLUCAN ENDOTRANSGLYCOSYLASE 7); hydrolase, acting on glycosyl bonds / hydrolase, hydrolyzing O-glycosyl compounds / xyloglucan:xyloglucosyl transferase	0.85424	0.01776
245353_at	AT4G16000	unknown protein	0.848723	0.0306098
245362_at	AT4G17460	HAT1; DNA binding / transcription factor	0.835885	0.0162712
245546_at	AT4G15290	ATCSLB05; cellulose synthase/ transferase/ transferase, transferring glycosyl groups	0.906634	0.0123596
245567_at	AT4G14630	GLP9 (GERMIN-LIKE PROTEIN 9); manganese ion binding / nutrient reservoir	0.734105	0.0437297
245637_at	AT1G25230	purple acid phosphatase family protein	0.782267	0.02925
245668_at	AT1G28330	DYL1 (DORMANCY-ASSOCIATED PROTEIN-LIKE 1)	1.228	0.0084375
245696_at	AT5G04190	PKS4 (phytochrome kinase substrate 4)	0.836075	0.0185496
245874_at	no_match	no_match	1.56719	0.000952381
245925_at	AT5G28770	BZO2H3; DNA binding / protein heterodimerization/ transcription factor	0.919096	0.0162185
246028_at	AT5G21170	5'-AMP-activated protein kinase beta-2 subunit, putative	0.923517	0.0132979
246108_at	AT5G28630	glycine-rich protein	0.960178	0.0174803
246114_at	AT5G20250	DIN10 (DARK INDUCIBLE 10); hydrolase, hydrolyzing O-glycosyl compounds	1.62209	0.001875
246238_at	AT4G36670	mannitol transporter, putative	1.19809	0.0173438
246855_at	AT5G26280	meprin and TRAF homology domain-containing protein / MATH domain-containing protein	0.758821	0.0362857
246911_at	AT5G25810	tny (TINY); DNA binding / transcription factor	0.845391	0.0150435
246991_at	AT5G67400	peroxidase 73 (PER73) (P73) (PRXR11)	0.705832	0.0439153
247297_at	AT5G64100	peroxidase, putative	1.30661	0.00305556
247324_at	AT5G64190	unknown protein	1.01081	0.00820896
247327_at	AT5G64120	peroxidase, putative	1.36262	0.00557692
247474_at	AT5G62280	unknown protein	1.11654	0.00468085
247477_at	AT5G62340	invertase/pectin methylesterase inhibitor family protein	1.01915	0.00721311
247524_at	AT5G61440	ACHT5 (ATYPICAL CYS HIS RICH THIOREDOXIN 5)	1.47389	0.00206897
247540_at	AT5G61590	AP2 domain-containing transcription factor family protein	1.10452	0.00871429
247586_at	AT5G60660	PIP2;4 (PLASMA MEMBRANE INTRINSIC PROTEIN 2;4); water channel	0.867175	0.0143396
247685_at	AT5G59680	leucine-rich repeat protein kinase, putative	0.968871	0.0111905
247734_at	AT5G59400	unknown protein	0.988979	0.0115116
247754_at	AT5G59080	unknown protein	0.905531	0.0296914
247903_at	AT5G57340	unknown protein	0.708961	0.0439674
247954_at	AT5G56870	BGAL4 (beta-galactosidase 4); beta-galactosidase	1.45802	0.00297297
248050_at	AT5G56100	glycine-rich protein / oleosin	0.787275	0.0296933
248183_at	AT5G54040	DC1 domain-containing protein	0.895077	0.0163636
248252_at	AT5G53250	AGP22 (ARABINOGALACTAN PROTEIN 22)	1.3738	0.000740741
248377_at	AT5G51720	unknown protein	1.60247	0.0008
248502_at	AT5G50450	zinc finger (MYND type) family protein	0.67799	0.0441361
248606_at	AT5G49450;AT5G49448	[AT5G49450, AtbZIP1 (Arabidopsis thaliana basic leucine-zipper 1); DNA binding / protein heterodimerization/ transcription factor];[AT5G49448, CPuORF4 (Conserved peptide upstream open reading frame 4)]	1.25102	0.0054
248622_at	AT5G49360	BXL1 (BETA-XYLOSIDASE 1); hydrolase, hydrolyzing O-glycosyl compounds	1.49394	0.00178571
248790_at	AT5G47450	AtTIP2;3; ammonia transporter/ methylammonium transmembrane transporter/ water channel	1.13173	0.00581818
248844_s_at	AT5G46900;AT5G46890	[AT5G46900, protease inhibitor/seed storage/lipid transfer protein (LTP) family protein];[AT5G46890, protease inhibitor/seed storage/lipid transfer protein (LTP) family protein]	0.93274	0.0123077
248910_at	AT5G45820	CIPK20 (CBL-INTERACTING PROTEIN KINASE 20); kinase/ protein serine/threonine kinase	1.33767	0.00672414
249097_at	AT5G43520	DC1 domain-containing protein	1.00412	0.0138776
249333_at	AT5G40990	GLIP1 (GDSL LIPASE1); carboxylesterase/ lipase	0.860625	0.0242177
249337_at	AT5G41080	glycerophosphoryl diester phosphodiesterase family protein	1.03149	0.0171545
249346_at	AT5G40780	LHT1; amino acid transmembrane transporter	1.5236	0.000833333
249358_at	AT5G40510	FUNCTIONS IN: molecular_function unknown; INVOLVED IN: biological_process unknown; LOCATED IN: cellular_component unknown; EXPRESSED IN: 14 plant structures; EXPRESSED DURING: 6 growth stages; CONTAINS InterPro DOMAIN/s: Thioredoxin fold (InterPro:IPR0123	0.711377	0.0398305
249364_at	AT5G40590	DC1 domain-containing protein	0.861749	0.0143636
249383_at	AT5G39860	PRE1 (PACLOBUTRAZOL RESISTANCE1); DNA binding / transcription factor	0.779819	0.0377273
249812_at	AT5G23830	MD-2-related lipid recognition domain-containing protein / ML domain-containing protein	0.803706	0.0185714
249814_at	AT5G23840	MD-2-related lipid recognition domain-containing protein / ML domain-containing protein	0.883376	0.0144954
249862_at	AT5G22920	zinc finger (C3HC4-type RING finger) family protein	2.20866	0
249923_at	AT5G19120	aspartic-type endopeptidase	1.19869	0.00365854
250012_x_at	AT5G18060	auxin-responsive protein, putative	0.96607	0.0101316
250073_at	AT5G17170	ENH1 (enhancer of sos3-1); electron carrier/ metal ion binding / protein binding	0.900734	0.0170492
250165_at	AT5G15290	integral membrane family protein	0.800758	0.0338506
250327_at	AT5G12050	unknown protein	1.59976	0.00117647
251017_at	AT5G02760	protein phosphatase 2C family protein / PP2C family protein	0.789456	0.0292547
251109_at	AT5G01600	ATFER1; ferric iron binding / iron ion binding	1.05803	0.026732
251195_at	AT3G62930	glutaredoxin family protein	1.01329	0.00849315
251196_at	AT3G62950	glutaredoxin family protein	2.27248	0
251356_at	AT3G61060	AtPP2-A13 (Arabidopsis thaliana phloem protein 2-A13); carbohydrate binding	1.78724	0.00105263
251401_at	AT3G60270	uclacyanin, putative	0.678336	0.0475253
251438_s_at	AT3G59930;AT5G33355	[AT3G59930, Encodes a defensin-like (DEFL) family protein,];[AT5G33355, Encodes a defensin-like (DEFL) family protein,]	1.80967	0.00142857
251517_at	AT3G59370	unknown protein	1.20163	0.00307692
252036_at	AT3G52070	unknown protein	0.830181	0.0237241
252040_at	AT3G52060	unknown protein	0.686189	0.0463021
252204_at	AT3G50340	unknown protein	0.772714	0.0253289
252250_at	AT3G49790	ATP binding	0.777061	0.0437363
252300_at	AT3G49160	pyruvate kinase family protein	2.34353	0
252367_at	AT3G48360	BT2 (BTB AND TAZ DOMAIN PROTEIN 2); protein binding / transcription factor/ transcription regulator	1.92904	0.00166667
252374_at	AT3G48100	ARR5 (ARABIDOPSIS RESPONSE REGULATOR 5); transcription regulator/ two-component response regulator	0.79496	0.025298
252415_at	AT3G47340	ASN1 (GLUTAMINE-DEPENDENT ASPARAGINE SYNTHASE 1); asparagine synthase (glutamine-hydrolyzing)	2.28412	0
252464_at	AT3G47160	protein binding / zinc ion binding	0.757839	0.0326163
252511_at	AT3G46280	protein kinase-related	1.18563	0.0195588
253061_at	AT4G37610	BT5 (BTB AND TAZ DOMAIN PROTEIN 5); protein binding / transcription regulator	1.25926	0.00264706
253125_at	AT4G36040	DNAJ heat shock N-terminal domain-containing protein (J11)	0.92553	0.0137374
253971_at	AT4G26530	fructose-bisphosphate aldolase, putative	1.0007	0.0184848
253998_at	AT4G26010	peroxidase, putative	0.992395	0.0103896
254001_at	AT4G26260	MIOX4; inositol oxygenase	1.13504	0.00589286
254056_at	AT4G25250	invertase/pectin methylesterase inhibitor family protein	0.907076	0.0125
254313_at	AT4G22460	protease inhibitor/seed storage/lipid transfer protein (LTP) family protein	0.807553	0.019562
254361_at	AT4G22212	Encodes a defensin-like (DEFL) family protein,	1.59121	0.00133333
254385_s_at	AT4G21830;AT4G21840	[AT4G21830, methionine sulfoxide reductase domain-containing protein / SeIR domain-containing protein];[AT4G21840, methionine sulfoxide reductase domain-containing protein / SelR domain-containing protein]	0.845172	0.0203623
254573_at	AT4G19420	pectinacetylesterase family protein	0.857935	0.021223
254644_at	AT4G18510	CLE2 (CLAVATA3/ESR-RELATED); protein binding / receptor binding	0.807777	0.017619
254764_at	AT4G13250	short-chain dehydrogenase/reductase (SDR) family protein	1.1195	0.00825397
254805_at	AT4G12480	pEARLI 1; lipid binding	1.98066	0.00111111
254818_at	AT4G12470	protease inhibitor/seed storage/lipid transfer protein (LTP) family protein	1.86208	0.00289474
254819_at	AT4G12500	protease inhibitor/seed storage/lipid transfer protein (LTP) family protein	1.0964	0.043617
254828_at	AT4G12550	AIR1; lipid binding	2.5329	0
254832_at	AT4G12490	protease inhibitor/seed storage/lipid transfer protein (LTP) family protein	1.39552	0.00833333
254907_at	AT4G11190	disease resistance-responsive family protein / dirigent family protein	0.81954	0.0164167
254909_at	AT4G11210	disease resistance-responsive family protein / dirigent family protein	1.21019	0.00357143
254914_at	AT4G11290	peroxidase, putative	0.735726	0.0427778
254954_at	AT4G10910	unknown protein	0.912162	0.0124444
255160_at	AT4G07820	pathogenesis-related protein, putative	1.09544	0.0055102
255310_at	AT4G04955	ATALN (Arabidopsis allantoinase); allantoinase/ hydrolase	0.84823	0.0482
255381_at	AT4G03510	RMA1; protein binding / ubiquitin-protein ligase/ zinc ion binding	1.37055	0.00181818
255516_at	AT4G02270	pollen Ole e 1 allergen and extensin family protein	0.875845	0.0231469
255617_at	AT4G01330	ATP binding / kinase/ protein kinase/ protein serine/threonine kinase/ protein tyrosine kinase	0.916819	0.0129348
255734_at	AT1G25550	myb family transcription factor	0.832944	0.0183721
255822_at	AT2G40610	ATEXPA8 (ARABIDOPSIS THALIANA EXPANSIN A8)	1.10298	0.00873239
256020_at	AT1G58290	HEMA1; glutamyl-tRNA reductase	0.861366	0.0223571
256098_at	AT1G13700	glucosamine/galactosamine-6-phosphate isomerase family protein	0.9651	0.0318563
256337_at	AT1G72060	serine-type endopeptidase inhibitor	0.873505	0.0423464
256349_at	AT1G54890	late embryogenesis abundant protein-related / LEA protein-related	0.788836	0.0230986
256469_at	AT1G32540	LOL1 (LSD ONE LIKE 1); DNA binding	0.883596	0.0186923
256596_at	AT3G28540	AAA-type ATPase family protein	1.05424	0.0102667
256766_at	AT3G22231	PCC1 (PATHOGEN AND CIRCADIAN CONTROLLED 1)	1.19611	0.0143689
256935_at	AT3G22570	protease inhibitor/seed storage/lipid transfer protein (LTP) family protein	1.08843	0.00520833
257315_at	AT3G30775	ERD5 (EARLY RESPONSIVE TO DEHYDRATION 5); proline dehydrogenase	1.00145	0.0434946
257373_at	AT2G43140	DNA binding / transcription factor	1.17914	0.010625
257381_at	AT2G37950	zinc finger (C3HC4-type RING finger) family protein	0.728461	0.0438421
257504_at	AT1G52240	ROPGEF11 (RHO GUANYL-NUCLEOTIDE EXCHANGE FACTOR 11); Rho guanyl-nucleotide exchange factor	0.939509	0.0131579
257832_at	AT3G26740	CCL (CCR-LIKE)	0.981223	0.0140594
257964_at	AT3G19850	phototropic-responsive NPH3 family protein	1.08491	0.00578947
258225_at	AT3G15630	unknown protein	1.6551	0.000869565
258262_at	AT3G15770	unknown protein	0.912209	0.0231944
258339_at	AT3G16120	dynein light chain, putative	0.77352	0.0440984
258468_at	AT3G06070	unknown protein	0.947197	0.00878378
258487_at	AT3G02550	LBD41 (LOB DOMAIN-CONTAINING PROTEIN 41)	0.820434	0.0272436
258552_at	AT3G07010	pectate lyase family protein	0.72815	0.0326316
259364_at	AT1G13260	RAV1; DNA binding / transcription factor/ transcription repressor	1.22242	0.00386364
259502_at	AT1G15670	kelch repeat-containing F-box family protein	0.932757	0.0144231
259544_at	AT1G20620	CAT3 (CATALASE 3); catalase	0.847134	0.0268182
259751_at	AT1G71030	MYBL2 (ARABIDOPSIS MYB-LIKE 2); DNA binding / transcription factor	1.01392	0.0158974
259758_s_at	AT1G77530;AT1G77520	[AT1G77530, O-methyltransferase family 2 protein];[AT1G77520, O-methyltransferase family 2 protein]	1.12042	0.00830769
259839_at	AT1G52190	proton-dependent oligopeptide transport (POT) family protein	0.716829	0.0434759
259982_at	AT1G76410	ATL8; protein binding / zinc ion binding	0.782737	0.047398
260037_at	AT1G68840	RAV2 (REGULATOR OF THE ATPASE OF THE VACUOLAR MEMBRANE); DNA binding / transcription factor/ transcription repressor	0.808392	0.0245946
260150_at	AT1G52820	2-oxoglutarate-dependent dioxygenase, putative	1.00442	0.0284177
260221_at	AT1G74670	gibberellin-responsive protein, putative	1.19026	0.00348837
260266_at	AT1G68520	zinc finger (B-box type) family protein	0.921674	0.0112195
260287_at	AT1G80440	kelch repeat-containing F-box family protein	1.8888	0
260431_at	AT1G68190	zinc finger (B-box type) family protein	0.797618	0.0312727
260623_at	AT1G08090	ATNRT2:1 (NITRATE TRANSPORTER 2:1); nitrate transmembrane transporter	0.974635	0.0126437
261006_at	AT1G26410	FAD-binding domain-containing protein	0.976171	0.0228369
261021_at	AT1G26380	FAD-binding domain-containing protein	1.45954	0.0035
261135_at	AT1G19610	PDF1,4	2.20208	0.00125
261211_at	AT1G12780	UGE1 (UDP-D-glucose/UDP-D-galactose 4-epimerase 1); UDP-glucose 4-epimerase/ protein dimerization	0.720488	0.0478894
261254_at	AT1G05805	basic helix-loop-helix (bHLH) family protein	0.708007	0.0492574
261395_at	AT1G79700	ovule development protein, putative	1.11346	0.00709677
261449_at	AT1G21120	O-methyltransferase, putative	1.18278	0.00861111
261459_at	AT1G21100	O-methyltransferase, putative	1.55527	0.00193548
261567_at	AT1G33055	unknown protein	1.6969	0.00125
261901_at	AT1G80920	J8; heat shock protein binding / unfolded protein binding	0.809348	0.0284713
261927_at	AT1G22500	zinc finger (C3HC4-type RING finger) family protein	0.901038	0.0324118
262170_at	AT1G74940	senescence-associated protein-related	0.762852	0.0249664
262254_at	AT1G53920	GLIP5; carboxylesterase/ lipase	0.791794	0.0292453
262456_at	AT1G11260	STP1 (SUGAR TRANSPORTER 1); carbohydrate transmembrane transporter/ sugar:hydrogen symporter	0.831059	0.0266452
262488_at	AT1G21830	unknown protein	0.684812	0.0493035
262838_at	AT1G14960	major latex protein-related / MLP-related	0.975567	0.00838235
262986_at	AT1G23390	kelch repeat-containing F-box family protein	1.07253	0.00566038
263098_at	AT2G16005	MD-2-related lipid recognition domain-containing protein / ML domain-containing protein	3.40695	0
263126_at	AT1G78460	SOUL heme-binding family protein	0.952289	0.0145536
263133_at	AT1G78450	SOUL heme-binding family protein	0.853748	0.0236986
263216_s_at	AT1G30720;AT1G30730	[AT1G30720, FAD-binding domain-containing protein];[AT1G30730, FAD-binding domain-containing protein]	1.25409	0.0137
263443_at	AT2G28630	KCS12 (3-KETOACYL-COA SYNTHASE 12); acyltransferase/ catalytic/ transferase, transferring acyl groups other than amino-acyl groups	1.02718	0.00884058
263831_at	AT2G40300	ATFER4 (ferritin 4); binding / ferric iron binding / oxidoreductase/ transition metal ion binding	1.18738	0.0054902
263840_at	AT2G36885	unknown protein	0.875179	0.0174194
263981_at	AT2G42870	PAR1 (PHY RAPIDLY REGULATED 1)	0.991493	0.0104938
264339_at	AT1G70290	ATTPS8; alpha,alpha-trehalose-phosphate synthase (UDP-forming)/ transferase, transferring glycosyl groups / trehalose-phosphatase	1.10483	0.00733333
264342_at	AT1G12080	unknown protein	0.895518	0.0148673
264379_at	AT2G25200	unknown protein	1.36001	0.00257143
264482_at	AT1G77210	sugar transporter, putative	0.735025	0.0327381
264567_s_at	AT1G05250;AT1G05240	[AT1G05250, peroxidase, putative];[AT1G05240, peroxidase, putative]	1.11129	0.00377778
264647_at	AT1G09090	ATRBOHB (respiratory burst oxidase homolog B); FAD binding / calcium ion binding / electron carrier/ iron ion binding / oxidoreductase/ oxidoreductase, acting on NADH or NADPH, with oxygen as acceptor / peroxidase	0.882346	0.0149123
264788_at	AT2G17880	DNAJ heat shock protein, putative	1.23317	0.00369565
265342_at	AT2G18300	basic helix-loop-helix (bHLH) family protein	0.729721	0.0340462
265387_at	AT2G20670	unknown protein	1.74444	0.00111111
265454_at	AT2G46530	ARF11 (AUXIN RESPONSE FACTOR 11); transcription factor	0.686409	0.0466495
265478_at	AT2G15890	MEE14 (maternal effect embryo arrest 14)	1.80181	0.00153846
265724_at	AT2G32100	OFP16 (ARABIDOPSIS THALIANA OVATE FAMILY PROTEIN 16)	0.762401	0.0492611
265917_at	AT2G15080	AtRLP19 (Receptor Like Protein 19); kinase/ protein binding	1.12849	0.00592593
265987_at	AT2G24240	potassium channel tetramerisation domain-containing protein	0.983033	0.010641
266072_at	AT2G18700	ATTPS11; transferase, transferring glycosyl groups	1.52923	0.000769231
266278_at	AT2G29300	tropinone reductase, putative / tropine dehydrogenase, putative	1.53536	0.000909091
266279_at	AT2G29290	tropinone reductase, putative / tropine dehydrogenase, putative	0.724637	0.0415169
266330_at	AT2G01530	MLP329 (MLP-LIKE PROTEIN 329); copper ion binding	1.08056	0.00694915
266353_at	AT2G01520	MLP328 (MLP-LIKE PROTEIN 328); copper ion binding	0.92648	0.0115294
266393_at	AT2G41260	M17	2.18301	0.00181818
266617_at	AT2G29670	binding	0.88326	0.0144144
266656_at	AT2G25900	ATCTH; transcription factor	0.914867	0.0144118
266693_at	AT2G19800	MIOX2 (MYO-INOSITOL OXYGENASE 2); inositol oxygenase	1.32775	0.0144762
266983_at	AT2G39400	hydrolase, alpha/beta fold family protein	1.00983	0.0143925
266984_at	AT2G39570	ACT domain-containing protein	0.937056	0.0194815
266992_at	AT2G39200	MLO12 (MILDEW RESISTANCE LOCUS O 12); calmodulin binding	1.22555	0.0140206
267045_at	AT2G34180	CIPK13 (CBL-INTERACTING PROTEIN KINASE 13); ATP binding / kinase/ protein kinase/ protein serine/threonine kinase	0.875763	0.0190299
267053_s_at	AT2G38380;AT2G38390	[AT2G38380, peroxidase 22 (PER22) (P22) (PRXEA) / basic peroxidase E];[AT2G38390, peroxidase, putative]	0.688749	0.0467358
267265_at	AT2G22980	serine-type carboxypeptidase	1.01113	0.0134375
267439_at	AT2G19060	GDSL-motif lipase/hydrolase family protein	0.689037	0.0476142
267461_at	AT2G33830	dormancy/auxin associated family protein	1.31415	0.0112048
267477_at	AT2G02710	PLPB (PAS/LOV PROTEIN B); signal transducer/ two-component sensor	0.860978	0.0326036
267523_at	AT2G30600	BTB/POZ domain-containing protein	1.23799	0.0144444
267524_at	AT2G30600	BTB/POZ domain-containing protein	1.27202	0.0130108
267614_at	AT2G26710	BAS1 (PHYB ACTIVATION TAGGED SUPPRESSOR 1); oxygen binding / steroid hydroxylase	0.844194	0.031506
267626_at	AT2G42250	CYP712A1; electron carrier/ heme binding / iron ion binding / monooxygenase/ oxygen binding	0.916953	0.0429282

## Sheet: 24 hpi Down-regulated
ID Affymetrix	Locus	Description	Fold change (Log2)	p-value
245253_at	AT4G15440	HPL1 (HYDROPEROXIDE LYASE 1); electron carrier/ heme binding / iron ion binding / monooxygenase	-1.09253	0.0185366
245277_at	AT4G15550	IAGLU (INDOLE-3-ACETATE BETA-D-GLUCOSYLTRANSFERASE); UDP-glycosyltransferase/ transferase, transferring glycosyl groups	-0.759345	0.0447208
245296_at	AT4G16370	ATOPT3 (OLIGOPEPTIDE TRANSPORTER); oligopeptide transporter	-1.71306	0.0008
245352_at	AT4G15490	UGT84A3; UDP-glycosyltransferase/ sinapate 1-glucosyltransferase/ transferase, transferring glycosyl groups	-1.37427	0.00571429
245627_at	AT1G56600	AtGolS2 (Arabidopsis thaliana galactinol synthase 2); transferase, transferring glycosyl groups / transferase, transferring hexosyl groups	-1.46041	0.0127273
245628_at	AT1G56650	PAP1 (PRODUCTION OF ANTHOCYANIN PIGMENT 1); DNA binding / transcription factor	-2.01814	0
245692_at	AT5G04150	BHLH101; DNA binding / transcription factor	-2.76974	0
245816_at	AT1G26210	unknown protein	-0.755507	0.0365574
245982_at	AT5G13170	SAG29 (SENESCENCE-ASSOCIATED PROTEIN 29)	-1.17737	0.0247222
246273_at	AT4G36700	cupin family protein	-3.41804	0
246340_s_at	AT3G44860;AT3G44870	[AT3G44860, FAMT (farnesoic acid carboxyl-O-methyltransferase); S-adenosylmethionine-dependent methyltransferase/ farnesoic acid O-methyltransferase];[AT3G44870, S-adenosyl-L-methionine:carboxyl methyltransferase family protein]	-1.39041	0.0104762
246463_at	AT5G16970	AT-AER (alkenal reductase); 2-alkenal reductase	-0.804402	0.042487
246464_at	AT5G16980	NADP-dependent oxidoreductase, putative	-1.29521	0.0054
246490_at	AT5G15950;AT5G15948	[AT5G15950, adenosylmethionine decarboxylase family protein];[AT5G15948, CPuORF10 (Conserved peptide upstream open reading frame 10)]	-0.824396	0.0269753
246789_at	AT5G27600	LACS7 (LONG-CHAIN ACYL-COA SYNTHETASE 7); long-chain-fatty-acid-CoA ligase/ protein binding	-0.741223	0.0424742
246998_at	AT5G67370	unknown protein	-1.03931	0.0115909
247001_at	AT5G67330	ATNRAMP4; inorganic anion transmembrane transporter/ manganese ion transmembrane transporter/ metal ion transmembrane transporter	-1.13382	0.00609375
247055_at	AT5G66740	unknown protein	-0.69854	0.0458291
247061_at	AT5G66780	unknown protein	-0.775578	0.0462439
247351_at	AT5G63790	ANAC102 (ARABIDOPSIS NAC DOMAIN CONTAINING PROTEIN 102); transcription factor	-1.22621	0.00561404
247393_at	AT5G63130	octicosapeptide/Phox/Bem1p (PB1) domain-containing protein	-1.08528	0.0262821
247704_at	AT5G59510	RTFL5 (ROTUNDIFOLIA LIKE 5)	-1.04	0.020229
247717_at	AT5G59320	LTP3 (LIPID TRANSFER PROTEIN 3); lipid binding	-1.28659	0.0434184
247718_at	AT5G59310	LTP4 (LIPID TRANSFER PROTEIN 4); lipid binding	-1.81228	0.0135644
247723_at	AT5G59220	protein phosphatase 2C, putative / PP2C, putative	-1.18332	0.0256849
247957_at	AT5G57050	ABI2 (ABA INSENSITIVE 2); protein serine/threonine phosphatase	-1.05876	0.0315976
248048_at	AT5G56080	NAS2 (NICOTIANAMINE SYNTHASE 2); nicotianamine synthase	-2.81028	0
248218_at	AT5G53710	unknown protein	-1.37321	0.00876712
248270_at	AT5G53450	ORG1 (OBP3-responsive gene 1); ATP binding / kinase/ protein kinase	-2.45002	0
248330_at	AT5G52810	ornithine cyclodeaminase/mu-crystallin family protein	-0.803257	0.0483654
248332_at	AT5G52640	ATHSP90,1 (HEAT SHOCK PROTEIN 90,1); ATP binding / unfolded protein binding	-1.04093	0.0161157
248352_at	AT5G52300	LTI65 (LOW-TEMPERATURE-INDUCED 65)	-1.36508	0.0353371
248353_at	AT5G52320	CYP96A4; electron carrier/ heme binding / iron ion binding / monooxygenase/ oxygen binding	-0.933445	0.0254054
248434_at	AT5G51440	23,5 kDa mitochondrial small heat shock protein (HSP23,5-M)	-1.10188	0.0312048
248467_at	AT5G50800	nodulin MtN3 family protein	-0.850882	0.0252349
248729_at	AT5G48010	THAS1 (THALIANOL SYNTHASE 1); catalytic/ thalianol synthase	-1.00934	0.0155856
248867_at	AT5G46830	basic helix-loop-helix (bHLH) family protein	-0.72597	0.0496729
249052_at	AT5G44420	PDF1,2	-1.40885	0.0114607
249191_at	AT5G42760	INVOLVED IN: biological_process unknown; LOCATED IN: cellular_component unknown; EXPRESSED IN: 21 plant structures; EXPRESSED DURING: 13 growth stages; CONTAINS InterPro DOMAIN/s: Conserved hypothetical protein CHP00027, methylltransferase (InterPro:IPR0	-0.811695	0.0265605
249266_at	AT5G41670	6-phosphogluconate dehydrogenase family protein	-0.999585	0.0125
249614_at	AT5G37300	WSD1; diacylglycerol O-acyltransferase/ long-chain-alcohol O-fatty-acyltransferase	-1.35745	0.00619048
249622_at	AT5G37550	unknown protein	-0.903641	0.0177049
249752_at	AT5G24660	LSU2 (RESPONSE TO LOW SULFUR 2)	-0.935382	0.0204651
249942_at	AT5G22300	NIT4 (NITRILASE 4); 3-cyanoalanine hydratase/ cyanoalanine nitrilase/ indole-3-acetonitrile nitrilase/ nitrilase/ nitrile hydratase	-1.13792	0.00646154
250094_at	AT5G17380	pyruvate decarboxylase family protein	-0.892992	0.0201563
250248_at	AT5G13740	ZIF1 (ZINC INDUCED FACILITATOR 1); carbohydrate transmembrane transporter/ sugar:hydrogen symporter/ tetracycline:hydrogen antiporter	-1.34341	0.00465116
250252_at	AT5G13750	ZIFL1 (ZINC INDUCED FACILITATOR-like 1); tetracycline:hydrogen antiporter	-0.726996	0.0427179
250351_at	AT5G12030	AT-HSP17,6A (ARABIDOPSIS THALIANA HEAT SHOCK PROTEIN 17,6A); unfolded protein binding	-1.3353	0.0122222
250408_at	AT5G10930	CIPK5 (CBL-INTERACTING PROTEIN KINASE 5); ATP binding / kinase/ protein kinase/ protein serine/threonine kinase	-0.941063	0.0349724
250472_at	AT5G10210	FUNCTIONS IN: molecular_function unknown; INVOLVED IN: biological_process unknown; LOCATED IN: cellular_component unknown; EXPRESSED IN: hypocotyl, root; CONTAINS InterPro DOMAIN/s: C2 calcium-dependent membrane targeting (InterPro:IPR000008); BEST Arabid	-1.31363	0.00452381
250670_at	AT5G06860	PGIP1 (POLYGALACTURONASE INHIBITING PROTEIN 1); protein binding	-0.785672	0.0332
250793_at	AT5G05600	oxidoreductase, 2OG-Fe(II) oxygenase family protein	-1.19651	0.0203846
250828_at	AT5G05250	unknown protein	-2.41258	0
250956_at	AT5G03210	unknown protein	-1.19471	0.0315476
251503_at	AT3G59140	ATMRP14; ATPase, coupled to transmembrane movement of substances	-1.09265	0.00893333
251531_at	AT3G58550	protease inhibitor/seed storage/lipid transfer protein (LTP) family protein	-0.6778	0.0497674
251545_at	AT3G58810	MTPA2 (METAL TOLERANCE PROTEIN A2); efflux transmembrane transporter/ inorganic anion transmembrane transporter/ zinc ion transmembrane transporter	-0.901729	0.0349444
251677_at	AT3G56980	BHLH039; DNA binding / transcription factor	-3.25948	0
251704_at	AT3G56360	unknown protein	-0.993092	0.0160345
251725_at	AT3G56260	unknown protein	-0.860452	0.0322989
251770_at	AT3G55970	oxidoreductase, 2OG-Fe(II) oxygenase family protein	-2.23423	0.000909091
251928_at	AT3G53980	protease inhibitor/seed storage/lipid transfer protein (LTP) family protein	-0.877313	0.0461576
251975_at	AT3G53230	cell division cycle protein 48, putative / CDC48, putative	-0.829033	0.0323392
252265_at	AT3G49620	DIN11 (DARK INDUCIBLE 11); iron ion binding / oxidoreductase	-1.64053	0.00603774
252269_at	AT3G49580	LSU1 (RESPONSE TO LOW SULFUR 1)	-1.02247	0.0159649
252340_at	AT3G48920	AtMYB45 (myb domain protein 45); DNA binding / transcription factor	-0.910206	0.0159292
252427_at	AT3G47640	basic helix-loop-helix (bHLH) family protein	-1.32597	0.00439024
252618_at	AT3G45140	LOX2 (LIPOXYGENASE 2); lipoxygenase	-1.73932	0.00225806
252746_at	AT3G43190	SUS4; UDP-glycosyltransferase/ sucrose synthase/ transferase, transferring glycosyl groups	-0.692664	0.0499061
252863_at	AT4G39800	MIPS1 (MYO-INOSITOL-1-PHOSTPATE SYNTHASE 1); inositol-3-phosphate synthase	-0.762655	0.0462189
252888_at	AT4G39210	APL3; glucose-1-phosphate adenylyltransferase	-1.24596	0.00666667
253046_at	AT4G37370	CYP81D8; electron carrier/ heme binding / iron ion binding / monooxygenase/ oxygen binding	-1.21452	0.0112644
253101_at	AT4G37430	CYP91A2 (CYTOCHROME P450 MONOOXYGENASE 91A2); electron carrier/ heme binding / iron ion binding / monooxygenase/ oxygen binding	-0.797837	0.0268125
253203_at	AT4G34710	ADC2 (ARGININE DECARBOXYLASE 2); arginine decarboxylase	-0.757962	0.0496226
253268_s_at	AT4G34131;AT4G34135	[AT4G34131, UGT73B3 (UDP-glucosyl transferase 73B3); UDP-glycosyltransferase/ abscisic acid glucosyltransferase/ quercetin 3-O-glucosyltransferase/ transferase, transferring hexosyl groups];[AT4G34135, UGT73B2 (UDP-GLUCOSYLTRANSFERASE 73B2); UDP-glucosylt	-1.35366	0.00378378
253293_at	AT4G33905	peroxisomal membrane protein 22 kDa, putative	-1.42947	0.0159664
253343_at	AT4G33540	metallo-beta-lactamase family protein	-0.996262	0.0143269
253382_at	AT4G33040	glutaredoxin family protein	-0.947708	0.0159167
253416_at	AT4G33070	pyruvate decarboxylase, putative	-0.818497	0.0276687
253483_at	AT4G31910	transferase family protein	-0.854961	0.0235211
253502_at	AT4G31940	CYP82C4; electron carrier/ heme binding / iron ion binding / monooxygenase/ oxygen binding	-1.36491	0.00901408
253638_at	AT4G30470	cinnamoyl-CoA reductase-related	-0.843125	0.0488095
253859_at	AT4G27657	unknown protein	-1.29121	0.0123404
254232_at	AT4G23600	CORI3 (CORONATINE INDUCED 1); cystathionine beta-lyase/ transaminase	-1.80354	0.000714286
254318_at	AT4G22530	embryo-abundant protein-related	-1.26803	0.00479167
254413_at	AT4G21440	ATMYB102 (ARABIDOPSIS MYB-LIKE 102); DNA binding / transcription factor	-0.946389	0.0323837
254550_at	AT4G19690	IRT1 (iron-regulated transporter 1); cadmium ion transmembrane transporter/ copper uptake transmembrane transporter/ iron ion transmembrane transporter/ manganese ion transmembrane transporter/ zinc ion transmembrane transporter	-1.67632	0.00388889
254759_at	AT4G13180	short-chain dehydrogenase/reductase (SDR) family protein	-1.37364	0.00424242
254952_at	AT4G10960;AT4G10955	[AT4G10960, UGE5 (UDP-D-glucose/UDP-D-galactose 4-epimerase 5); UDP-glucose 4-epimerase/ protein dimerization];[AT4G10955, lipase class 3 family protein]	-1.14097	0.00888889
255259_at	AT4G05020	NDB2 (NAD(P)H dehydrogenase B2); FAD binding / disulfide oxidoreductase/ oxidoreductase	-0.868456	0.019127
255521_at	AT4G02280	SUS3 (sucrose synthase 3); UDP-glycosyltransferase/ sucrose synthase/ transferase, transferring glycosyl groups	-1.42428	0.00425
255543_at	AT4G01870	tolB protein-related	-0.948202	0.0210294
255575_at	AT4G01430	nodulin MtN21 family protein	-0.848562	0.0289634
255604_at	AT4G01080	unknown protein	-0.895619	0.0202239
255795_at	AT2G33380	RD20 (RESPONSIVE TO DESSICATION 20); calcium ion binding	-1.8441	0.00612903
255891_at	AT1G17870	EGY3 (ETHYLENE-DEPENDENT GRAVITROPISM-DEFICIENT AND YELLOW-GREEN-LIKE 3)	-1.4626	0.00962025
256245_at	AT3G12580	HSP70 (heat shock protein 70); ATP binding	-0.897187	0.0271429
256589_at	AT3G28740	CYP81D1; electron carrier/ heme binding / iron ion binding / monooxygenase/ oxygen binding	-2.87062	0
256593_at	AT3G28510	AAA-type ATPase family protein	-1.16569	0.00592593
256779_at	AT3G13784	AtcwINV5 (Arabidopsis thaliana cell wall invertase 5); hydrolase, hydrolyzing O-glycosyl compounds	-1.29922	0.00797101
257062_at	AT3G18290	EMB2454 (embryo defective 2454); protein binding / zinc ion binding	-1.78402	0.000952381
257271_at	AT3G28007	nodulin MtN3 family protein	-1.15741	0.0368108
257280_at	AT3G14440	NCED3 (NINE-CIS-EPOXYCAROTENOID DIOXYGENASE 3); 9-cis-epoxycarotenoid dioxygenase	-1.16319	0.0255102
257365_x_at	AT2G26020	PDF1,2b (plant defensin 1,2b)	-1.56917	0.010122
257421_at	AT1G12030	unknown protein	-2.4574	0
257481_at	AT1G08430	ALMT1 (ALUMINUM-ACTIVATED MALATE TRANSPORTER 1); malate transmembrane transporter	-1.39722	0.00411765
257645_at	AT3G25790	myb family transcription factor	-0.734962	0.0381818
257830_at	AT3G26690	ATNUDX13 (ARABIDOPSIS THALIANA NUDIX HYDROLASE HOMOLOG 13); bis(5'-adenosyl)-pentaphosphatase/ hydrolase	-0.705314	0.045404
258033_at	AT3G21250	ATMRP6; ATPase, coupled to transmembrane movement of substances	-0.946695	0.0158475
258107_at	AT3G23560	ALF5 (ABERRANT LATERAL ROOT FORMATION 5); antiporter/ drug transporter/ transporter	-1.05787	0.00905405
258207_at	AT3G14050	RSH2 (RELA-SPOT HOMOLOG 2); GTP diphosphokinase	-0.973102	0.0158974
258270_at	AT3G15650	phospholipase/carboxylesterase family protein	-0.714878	0.0396842
258347_at	AT3G17520	late embryogenesis abundant domain-containing protein / LEA domain-containing protein	-1.51186	0.0203704
258498_at	AT3G02480	ABA-responsive protein-related	-2.98861	0
258757_at	AT3G10912;AT3G10910	[AT3G10912, CPuORF63 (Conserved peptide upstream open reading frame 63)];[AT3G10910, zinc finger (C3HC4-type RING finger) family protein]	-0.820777	0.0461386
258890_at	AT3G05690	NF-YA2 (NUCLEAR FACTOR Y, SUBUNIT A2); transcription factor	-0.876207	0.0268
258979_at	AT3G09440	heat shock cognate 70 kDa protein 3 (HSC70-3) (HSP70-3)	-0.694188	0.0492417
258983_at	AT3G08860	alanine--glyoxylate aminotransferase, putative / beta-alanine-pyruvate aminotransferase, putative / AGT, putative	-0.95805	0.0398413
259116_at	AT3G01350	proton-dependent oligopeptide transport (POT) family protein	-0.858282	0.0265132
259329_at	AT3G16360	AHP4 (HPT PHOSPHOTRANSMITTER 4); histidine phosphotransfer kinase/ transferase, transferring phosphorus-containing groups	-1.43446	0.0120879
259432_at	AT1G01520	myb family transcription factor	-1.06392	0.0215942
259632_at	AT1G56430	NAS4 (NICOTIANAMINE SYNTHASE 4); nicotianamine synthase	-1.45003	0.00172414
259705_at	AT1G77450	anac032 (Arabidopsis NAC domain containing protein 32); transcription factor	-1.91939	0.00105263
259875_s_at	AT1G76680;AT1G76690	[AT1G76680, OPR1; 12-oxophytodienoate reductase];[AT1G76690, OPR2]	-1.17847	0.00581818
259911_at	AT1G72680	cinnamyl-alcohol dehydrogenase, putative	-1.17509	0.00606557
259953_at	AT1G74810	BOR5; anion exchanger	-1.76859	0.000833333
259968_at	AT1G76530	auxin efflux carrier family protein	-0.930818	0.0143137
259980_at	AT1G76520	auxin efflux carrier family protein	-0.904141	0.0201504
260030_at	AT1G68880	AtbZIP (Arabidopsis thaliana basic leucine-zipper 8); DNA binding / transcription factor	-0.929386	0.0200758
260097_at	AT1G73220	AtOCT1 (Arabidopsis thaliana ORGANIC CATION/CARNITINE TRANSPORTER1); carbohydrate transmembrane transporter/ carnitine transporter/ transporter	-1.41395	0.00489362
260357_at	AT1G69260	AFP1 (ABI FIVE BINDING PROTEIN)	-1.47376	0.0123656
260399_at	AT1G72520	lipoxygenase, putative	-0.928728	0.019685
260408_at	AT1G69880	ATH8 (thioredoxin H-type 8)	-0.9584	0.0155357
260475_at	AT1G11080	scpl31 (serine carboxypeptidase-like 31); serine-type carboxypeptidase	-1.02786	0.00974359
260517_at	AT1G51420	SPP1 (SUCROSE-PHOSPHATASE 1); catalytic/ magnesium ion binding / phosphatase/ sucrose-phosphatase	-1.12951	0.00583333
260560_at	AT2G43590	chitinase, putative	-1.06677	0.00974026
260592_at	AT1G55850	ATCSLE1; cellulose synthase/ transferase, transferring glycosyl groups	-0.840497	0.0267089
260602_at	AT1G55920	ATSERAT2;1 (SERINE ACETYLTRANSFERASE 2;1); serine O-acetyltransferase	-0.750179	0.0317365
260784_at	AT1G06180	ATMYB13 (MYB DOMAIN PROTEIN 13); DNA binding / transcription factor	-1.00012	0.01896
260803_at	AT1G78340	ATGSTU22 (GLUTATHIONE S-TRANSFERASE TAU 22); glutathione transferase	-0.695943	0.0488995
261023_at	AT1G12200	flavin-containing monooxygenase family protein / FMO family protein	-0.73923	0.0331818
261065_at	AT1G07500	unknown protein	-1.13108	0.0123913
261077_at	AT1G07430	protein phosphatase 2C, putative / PP2C, putative	-1.23208	0.0263399
261150_at	AT1G19640	JMT (JASMONIC ACID CARBOXYL METHYLTRANSFERASE); jasmonate O-methyltransferase	-0.956756	0.0145714
261247_at	AT1G20070	unknown protein	-1.26455	0.0054902
261266_at	AT1G26770	ATEXPA10 (ARABIDOPSIS THALIANA EXPANSIN A 10); structural constituent of cell wall	-1.05874	0.0104706
261564_at	AT1G01720	ATAF1; transcription activator/ transcription factor	-1.24189	0.00934211
261661_at	AT1G18360	hydrolase, alpha/beta fold family protein	-0.716601	0.0457
261684_at	AT1G47400	unknown protein	-4.27761	0
261785_at	AT1G08230	amino acid transporter family protein	-0.990239	0.0321176
261806_at	AT1G30510	ATRFNR2 (ROOT FNR 2); FAD binding / NADP or NADPH binding / electron carrier/ ferredoxin-NADP+ reductase/ oxidoreductase	-1.33897	0.00384615
262050_at	AT1G80130	binding	-0.792383	0.047343
262092_at	AT1G56150	auxin-responsive family protein	-0.937824	0.0208759
262098_at	AT1G56170	NF-YC2 (NUCLEAR FACTOR Y, SUBUNIT C2); DNA binding / transcription activator/ transcription factor	-1.11503	0.0149541
262118_at	AT1G02850	BGLU11 (BETA GLUCOSIDASE 11); catalytic/ cation binding / hydrolase, hydrolyzing O-glycosyl compounds	-2.06144	0
262128_at	AT1G52690	late embryogenesis abundant protein, putative / LEA protein, putative	-1.63445	0.0231206
262218_at	AT1G74770	protein binding / zinc ion binding	-0.926259	0.0266887
262281_at	AT1G68570	proton-dependent oligopeptide transport (POT) family protein	-0.915523	0.0263226
262373_at	AT1G73120	unknown protein	-1.13807	0.0106024
262381_at	AT1G72900	disease resistance protein (TIR-NBS class), putative	-1.04917	0.0303636
262382_at	AT1G72920	disease resistance protein (TIR-NBS class), putative	-1.01766	0.0141748
262448_at	AT1G49450	transducin family protein / WD-40 repeat family protein	-1.10076	0.0263636
262482_at	AT1G17020	SRG1 (SENESCENCE-RELATED GENE 1); oxidoreductase, acting on diphenols and related substances as donors, oxygen as acceptor / oxidoreductase, acting on paired donors, with incorporation or reduction of molecular oxygen, 2-oxoglutarate as one donor, and inc	-1.10064	0.0106977
262517_at	AT1G17180	ATGSTU25 (GLUTATHIONE S-TRANSFERASE TAU 25); glutathione transferase	-2.03955	0
262518_at	AT1G17170	ATGSTU24 (GLUTATHIONE S-TRANSFERASE TAU 24); glutathione binding / glutathione transferase	-1.66018	0.000869565
262653_at	AT1G14130	2-oxoglutarate-dependent dioxygenase, putative	-0.681595	0.046068
262868_at	AT1G64980	unknown protein	-1.04593	0.009625
262935_at	AT1G79410	AtOCT5 (Arabidopsis thaliana ORGANIC CATION/CARNITINE TRANSPORTER5); carbohydrate transmembrane transporter/ sugar:hydrogen symporter	-1.39974	0.00375
263046_at	AT2G05380	GRP3S (GLYCINE-RICH PROTEIN 3 SHORT ISOFORM)	-1.02691	0.012551
263096_at	AT2G16060	AHB1 (ARABIDOPSIS HEMOGLOBIN 1); oxygen binding / oxygen transporter	-1.32352	0.00488889
263184_at	AT1G05560	UGT75B1 (UDP-GLUCOSYLTRANSFERASE 75B1); UDP-glucose:4-aminobenzoate acylglucosyltransferase/ UDP-glucosyltransferase/ UDP-glycosyltransferase/ abscisic acid glucosyltransferase/ transferase, transferring glycosyl groups	-1.94245	0
263210_at	AT1G10585	transcription factor	-0.906212	0.0366667
263231_at	AT1G05680	UDP-glucoronosyl/UDP-glucosyl transferase family protein	-2.80459	0
263433_at	AT2G22240	MIPS2 (MYO-INOSITOL-1-PHOSTPATE SYNTHASE 2); binding / catalytic/ inositol-3-phosphate synthase	-0.89682	0.0464706
263544_at	AT2G21590	APL4; glucose-1-phosphate adenylyltransferase	-1.18332	0.0125773
263829_at	AT2G40435	EXPRESSED IN: 20 plant structures; EXPRESSED DURING: 13 growth stages; BEST Arabidopsis thaliana protein match is: transcription regulator (TAIR:AT3G56220,1); Has 165 Blast hits to 165 proteins in 20 species: Archae - 0; Bacteria - 0; Metazoa - 0; Fungi -	-1.12583	0.00842857
263847_at	AT2G36970	UDP-glucoronosyl/UDP-glucosyl transferase family protein	-0.770401	0.0388298
263985_at	AT2G42750	DNAJ heat shock N-terminal domain-containing protein	-1.64235	0.000769231
264091_at	AT1G79110	protein binding / zinc ion binding	-0.732515	0.0401047
264146_at	AT1G02205	CER1 (ECERIFERUM 1); octadecanal decarbonylase	-1.0323	0.036413
264217_at	AT1G60190	armadillo/beta-catenin repeat family protein / U-box domain-containing protein	-1.785	0.00557692
264318_at	AT1G04220	KCS2 (3-KETOACYL-COA SYNTHASE 2); fatty acid elongase	-1.04205	0.0136
264415_at	AT1G43160	RAP2,6 (related to AP2 6); DNA binding / transcription factor	-1.27008	0.0148598
264514_at	AT1G09500	cinnamyl-alcohol dehydrogenase family / CAD family	-1.4246	0.0351397
264751_at	AT1G23020	FRO3; ferric-chelate reductase	-2.03373	0
264809_at	AT1G08830	CSD1 (COPPER/ZINC SUPEROXIDE DISMUTASE 1); superoxide dismutase	-0.866186	0.0214388
264859_at	AT1G24280	G6PD3 (GLUCOSE-6-PHOSPHATE DEHYDROGENASE 3); glucose-6-phosphate dehydrogenase	-1.19644	0.00559322
264929_at	AT1G60730	aldo/keto reductase family protein	-0.817984	0.0324855
264953_at	AT1G77120	ADH1 (ALCOHOL DEHYDROGENASE 1); alcohol dehydrogenase	-1.14543	0.00716418
265099_at	AT1G03990	alcohol oxidase-related	-1.6364	0.000740741
265216_at	AT1G05100	MAPKKK18; ATP binding / kinase/ protein kinase/ protein serine/threonine kinase	-1.29706	0.014717
265499_at	AT2G15480	UGT73B5 (UDP-glucosyl transferase 73B5); UDP-glucosyltransferase/ UDP-glycosyltransferase/ quercetin 3-O-glucosyltransferase/ transferase, transferring glycosyl groups	-1.18972	0.00551724
265501_at	AT2G15490	UGT73B4 (UDP-GLYCOSYLTRANSFERASE 73B4); UDP-glucosyltransferase/ UDP-glycosyltransferase/ quercetin 3-O-glucosyltransferase/ quercetin 7-O-glucosyltransferase/ transferase, transferring glycosyl groups	-2.26166	0
265670_s_at	AT2G32190;AT2G32210	[AT2G32190, unknown protein];[AT2G32210, unknown protein]	-1.03659	0.0102469
265674_at	no_match	no_match	-0.93485	0.015913
266098_at	AT2G37870	protease inhibitor/seed storage/lipid transfer protein (LTP) family protein	-1.26945	0.0425521
266142_at	AT2G39030	GCN5-related N-acetyltransferase (GNAT) family protein	-1.11648	0.0266667
266155_at	no_match	no_match	-1.0005	0.0184677
266222_at	AT2G28780	unknown protein	-0.90733	0.0258621
266267_at	AT2G29460	ATGSTU4 (ARABIDOPSIS THALIANA GLUTATHIONE S-TRANSFERASE TAU 4); glutathione transferase	-1.20375	0.00764706
266290_at	AT2G29490	ATGSTU1 (GLUTATHIONE S-TRANSFERASE TAU 1); glutathione transferase	-1.29734	0.00477273
266294_at	AT2G29500	17,6 kDa class I small heat shock protein (HSP17,6B-CI)	-1.18949	0.0341808
266296_at	AT2G29420	ATGSTU7 (ARABIDOPSIS THALIANA GLUTATHIONE S-TRANSFERASE TAU 7); glutathione transferase	-1.32227	0.00394737
266327_at	AT2G46680	ATHB-7 (ARABIDOPSIS THALIANA HOMEOBOX 7); transcription activator/ transcription factor	-1.24541	0.0230714
266368_at	AT2G41380	embryo-abundant protein-related	-0.987371	0.0125263
266503_at	AT2G47780	rubber elongation factor (REF) protein-related	-1.26203	0.0242657
266544_at	AT2G35300	late embryogenesis abundant group 1 domain-containing protein / LEA group 1 domain-containing protein	-1.10229	0.0497685
266965_at	AT2G39510	nodulin MtN21 family protein	-0.826979	0.0352198
267080_at	AT2G41190	amino acid transporter family protein	-1.45087	0.0149091
267168_at	AT2G37770	aldo/keto reductase family protein	-2.51615	0
267181_at	AT2G37760	aldo/keto reductase family protein	-1.33486	0.0055102
